# Supplementary material for: Whole Exome Sequencing Enhanced Imputation Identifies 85 Metabolite Associations in the Alpine CHRIS Cohort
Source: MDPI journal article supplement (doi:10.3390/metabo12070604), 2022-06-29
Supplement: s1 [file s1]

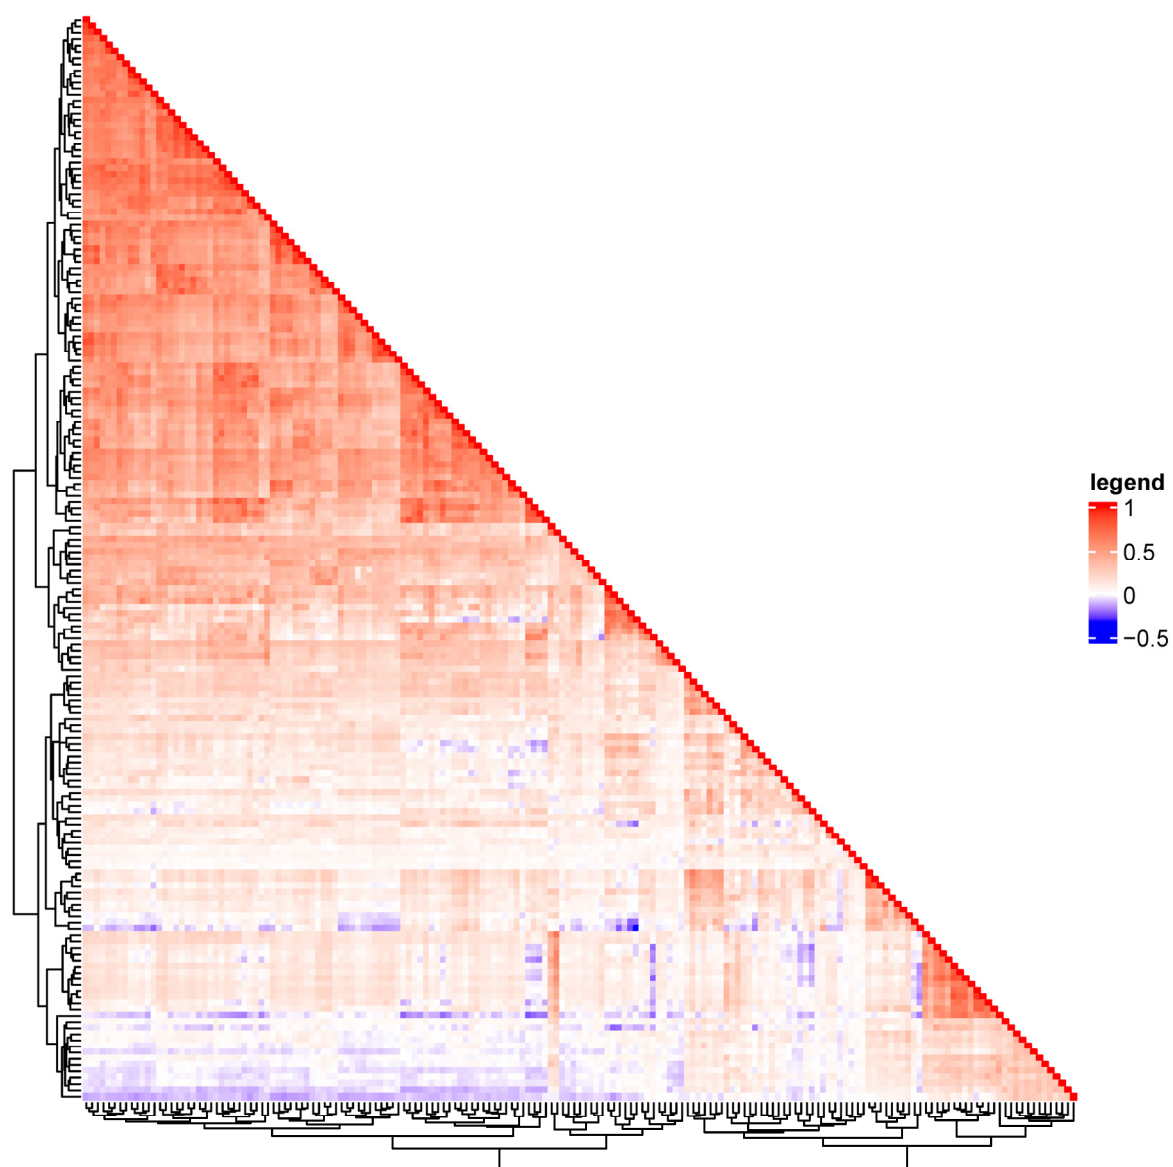

**Figure S2.** Heatmap of the Spearman correlation of the rank inverse normal transformed values of the 175 metabolomic traits.
