# Supplementary material for: Whole Exome Sequencing Enhanced Imputation Identifies 85 Metabolite Associations in the Alpine CHRIS Cohort
Source: MDPI journal article supplement (doi:10.3390/metabo12070604), 2022-06-29
Supplement: s1 [file s1]

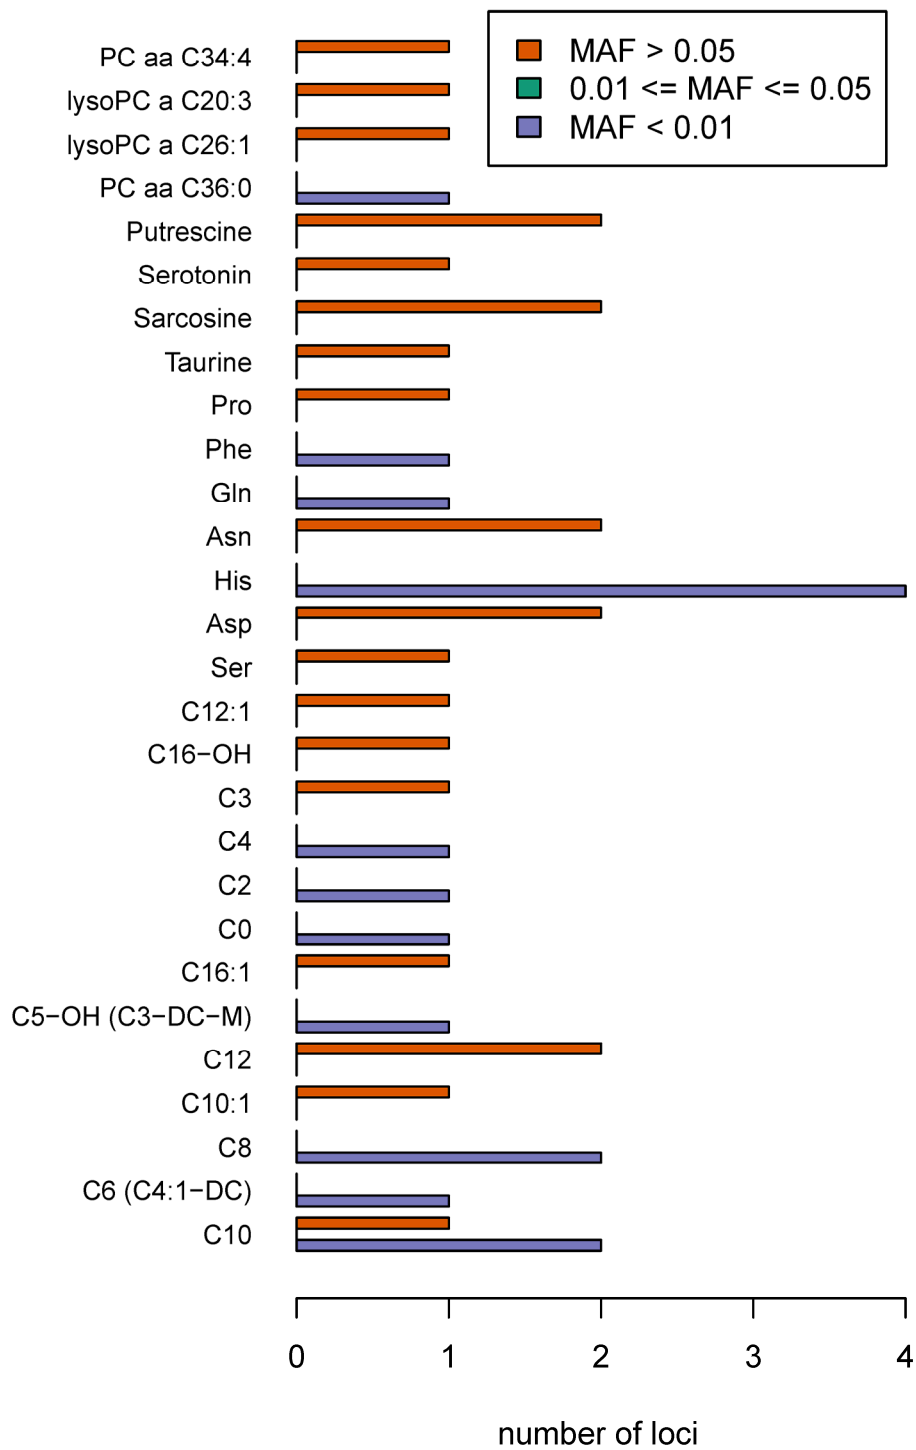

**Figure S5.** Number of conditionally significant associations per trait, split into rare ( $MAF \leq 1$ ) and common ( $MAF > 1$ ) associations. Traits without any significant associations are omitted. Traits are ordered according to their class and separated by the horizontal dotted lines.
