# Supplementary material for: Whole Exome Sequencing Enhanced Imputation Identifies 85 Metabolite Associations in the Alpine CHRIS Cohort
Source: Metabolites. 2022 Jun 29;12(7):604. doi: 10.3390/metabo12070604 (PMC9320943; doi:10.3390/metabo12070604)
Supplement: Supplementary file 1 [file metabolites-12-00604-s001.zip › Figure S4.pdf]

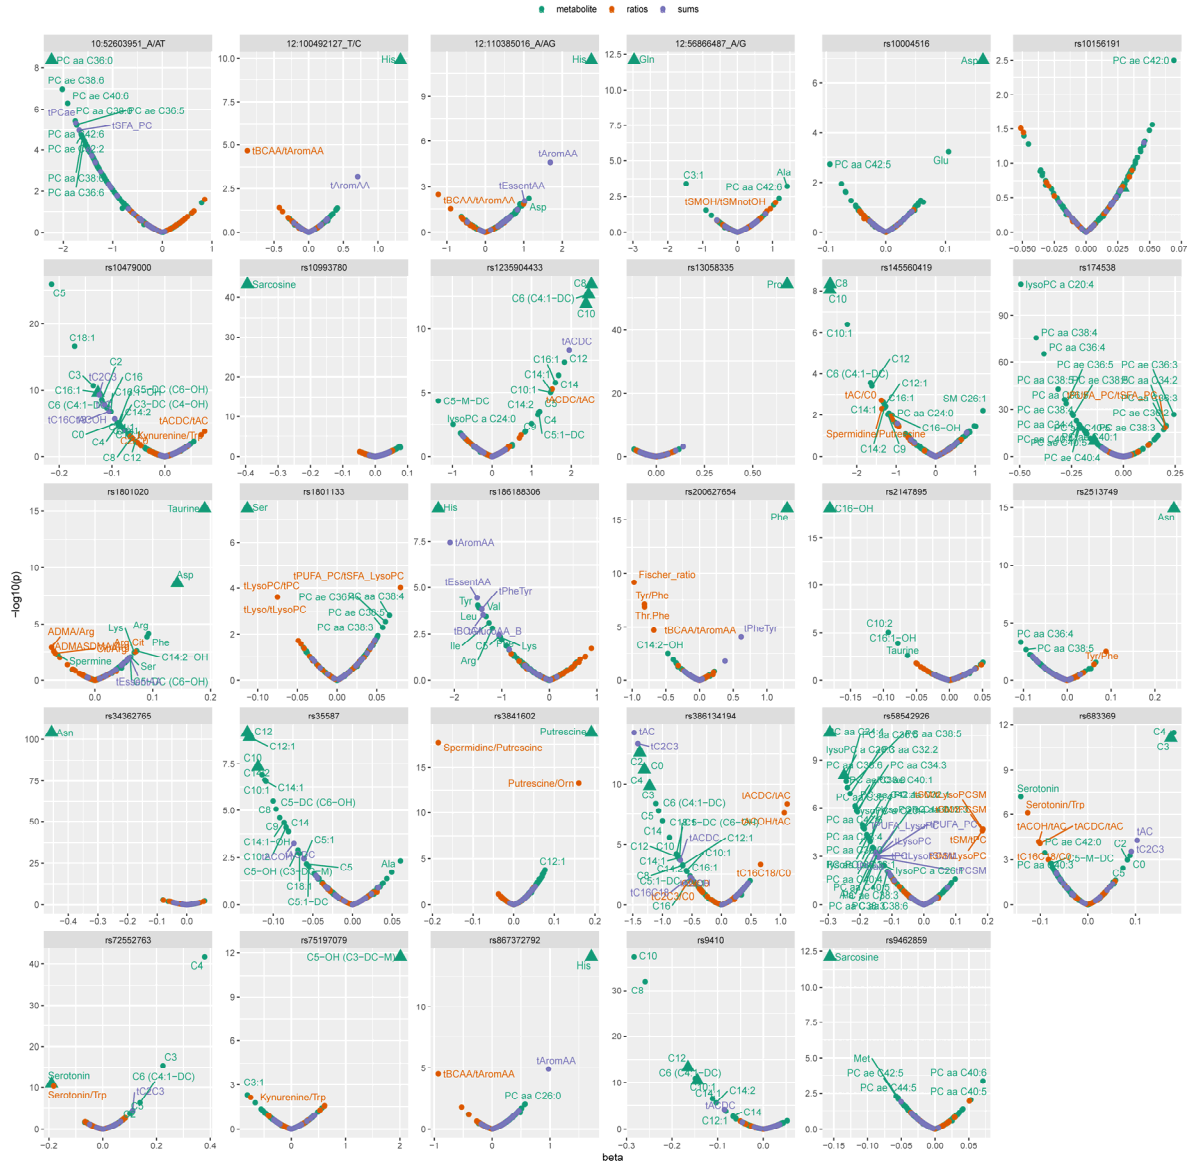

**Figure S4.** Minus log<sub>10</sub> *p*-value versus beta of all traits for all index variants. For the significant association (triangle), beta is plotted against *p*-value for all other metabolites (green) and the ratios (orange) and sums (purple).
