# Supplementary material for: Whole Exome Sequencing Enhanced Imputation Identifies 85 Metabolite Associations in the Alpine CHRIS Cohort
Source: Metabolites. 2022 Jun 29;12(7):604. doi: 10.3390/metabo12070604 (PMC9320943; doi:10.3390/metabo12070604)
Supplement: Supplementary file 1 [file metabolites-12-00604-s001.zip › Tables S1¿CS8.xlsx]

## Sheet: Table S1
Table S1. Metabolomic traits investigated in this study.
Trait code	Trait name	Aliases	Trait class	Trait quantification	Formula	HMDB_id
ADMA	Asymmetric dimethylarginine	ADMA	biogenic amines	semi	C8H18N4O2	HMDB0001539
Ala	Alanine	Alanine	aminoacids	ok	C3H7NO2	HMDB0000161
alpha-AAA	alpha-Aminoadipic acid	alpha-Aminoadipic acid	biogenic amines	semi	C6H11NO4	HMDB0000510
Arg	Arginine	Arginine	aminoacids	ok	C6H14N4O2	HMDB0000517
Asn	Asparagine	Asparagine	aminoacids	ok	C4H8N2O3	HMDB0000168
Asp	Aspartate	Aspartate	aminoacids	semi	C4H7NO4	HMDB0000191
Cit	Citrulline	Citrulline	aminoacids	semi	C6H13N3O3	HMDB0000904
Creatinine	Creatinine	Creatinine	biogenic amines	ok	C4H7N3O	HMDB0000562
DOPA	Dihydroxyphenylalanine	Levodopa	biogenic amines	semi	C9H11NO4	HMDB0000181
Gln	Glutamine	Glutamine	aminoacids	ok	C5H10N2O3	HMDB0000641
Glu	Glutamate	L-Glutamic Acid	aminoacids	ok	C5H9NO4	HMDB0000148
Gly	Glycine	Glycine	aminoacids	ok	C2H5NO2	HMDB0000123
His	Histidine	Histidine	aminoacids	ok	C6H9N3O2	HMDB0000177
Histamine	Histamine	Histamine	biogenic amines	semi	C5H9N3	HMDB0000870
Ile	Isoleucine	Isoleucine	aminoacids	ok	C6H13NO2	HMDB0000172
Kynurenine	Kynurenine	Kynureine	biogenic amines	semi	C10H12N2O3	HMDB0000684
Leu	Leucine	Leucine	aminoacids	ok	C6H13NO2	HMDB0000687
Lys	Lysine	Lysine	aminoacids	ok	C6H14N2O2	HMDB0000182
Met	Methionine	Methionine	aminoacids	ok	C5H11NO2S	HMDB0000696
Met-SO	Methioninesulfoxide	Methioninesulfoxide	biogenic amines	semi	C5H11NO3S	HMDB0002005
Orn	Ornithine	Ornithine	aminoacids	ok	C5H12N2O2	HMDB0000214
Phe	Phenylalanine	Phenylalanine	aminoacids	ok	C9H11NO2	HMDB0000159
Pro	Proline	Proline	aminoacids	ok	C5H9NO2	HMDB0000162
Putrescine	Putrescine	Putrescine	biogenic amines	ok	C4H12N2	HMDB0001414
Sarcosine	Sarcosine	Sarcosine	biogenic amines	ok	C3H7NO2	HMDB0000271
SDMA	Symmetric dimethylarginine	SDMA	biogenic amines	semi	C8H18N4O2	HMDB0003334
Ser	Serine	Serine	aminoacids	ok	C3H7NO3	HMDB0000187
Serotonin	Serotonin	Serotonin	biogenic amines	ok	C10H12N2O	HMDB0000259
Spermidine	Spermidine	Spermidine	biogenic amines	semi	C7H19N3	HMDB0001257
Spermine	Spermine	Spermine	biogenic amines	semi	C10H26N4	HMDB0001256
t4-OH-Pro	trans-4-Hydroxyproline	Hydroxyproline	biogenic amines	semi	C5H9NO3	HMDB0000725
Taurine	Taurine	Taurine	biogenic amines	ok	C2H7NO3S	HMDB0000251
Thr	Threonine	L-Threonine	aminoacids	ok	C4H9NO3	HMDB0000167
Trp	Tryptophan	Tryptophan	aminoacids	ok	C11H12N2O2	HMDB0000929
Tyr	Tyrosine	Tyrosine	aminoacids	ok	C9H11NO3	HMDB0000158
Val	Valine	Valine	aminoacids	ok	C5H11NO2	HMDB0000883
C0	Carnitine	L-Carnitine	acylcarnitines	ok	C7H15NO3	HMDB0000062
C10		Decanoylcarnitine	acylcarnitines	ok	C17H33NO4	HMDB0000651;HMDB0062631
C10:1	Decenoylcarnitine	Decenoylcarnitine	acylcarnitines	semi	C17H31NO4	HMDB0013205;HMDB0240585
C10:2	Decadienylcarnitine	Decadienylcarnitine	acylcarnitines	semi	C17H29NO4	HMDB0013325
C12	Dodecanoylcarnitine	Dodecanoylcarnitine	acylcarnitines	ok	C19H37NO4	HMDB0002250
C12-DC	Dodecanedioylcarnitine	Dodecanedioylcarnitine	acylcarnitines	semi	C19H35NO6	HMDB0013327
C12:1	Dodecenoylcarnitine	Dodecenoylcarnitine	acylcarnitines	semi	C19H35NO4	HMDB0013326
C14	Tetradecanoylcarnitine	Tetradecanoylcarnitine	acylcarnitines	ok	C21H41NO4	HMDB0005066
C14:1	Tetradecenoylcarnitine	Tetradecenoylcarnitine	acylcarnitines	semi	C21H39NO4	HMDB0013329;HMDB0002014;HMDB0240588
C14:1-OH	Hydroxytetradecenoylcarnitine	Hydroxytetradecenoylcarnitine	acylcarnitines	semi	C21H39NO5	HMDB0013330;HMDB0062517
C14:2	Tetradecadienylcarnitine	Tetradecadienylcarnitine	acylcarnitines	semi	C21H37NO4	HMDB0013331
C14:2-OH	Hydroxytetradecadienylcarnitine	Hydroxytetradecadienylcarnitine	acylcarnitines	semi	C21H37NO5	HMDB0013332
C16	Hexadecanoylcarnitine	Hexadecanoylcarnitine	acylcarnitines	ok	C23H45NO4	HMDB0000222
C16-OH	Hydroxyhexadecanoylcarnitine	Hydroxyhexadecanoylcarnitine	acylcarnitines	semi	C23H45NO5	HMDB0013336;HMDB0061642
C16:1	Hexadecenoylcarnitine	Hexadecenoylcarnitine	acylcarnitines	semi	C23H43NO4	HMDB0013207;HMDB0006317
C16:1-OH	Hydroxyhexadecenoylcarnitine	Hydroxyhexadecenoylcarnitine	acylcarnitines	semi	C23H43NO5	HMDB0013333;HMDB0006210
C18	Octadecanoylcarnitine	Octadecanoylcarnitine	acylcarnitines	ok	C25H49NO4	HMDB0000848
C18:1	Octadecenoylcarnitine	Octadecenoylcarnitine	acylcarnitines	semi	C25H47NO4	HMDB0094687;HMDB0013338;HMDB0013337;HMDB0006464;HMDB0006351;HMDB0005065
C2	Acetylcarnitine	Acetylcarnitine	acylcarnitines	ok	C9H17NO4	HMDB0000201
C3	Propionylcarnitine	C3 Carnitine	acylcarnitines	ok	C10H19NO4	HMDB0000824
C3-DC (C4-OH)	Hydroxybutyrylcarnitine	3-Hydroxybutyrylcarnitine	acylcarnitines	semi	C11H21NO5	HMDB0013127;HMDB0062735;HMDB0002095
C3:1	Propenoylcarnitine	Propenoylcarnitine	acylcarnitines	semi	C10H17NO4	HMDB0013124
C4	Butyrylcarnitine	Butyrylcarnitine	acylcarnitines	ok	C11H21NO4	HMDB0002013;HMDB0000736
C4:1	Butenylcarnitine	Butenylcarnitine	acylcarnitines	semi	C11H19NO4	HMDB0013126
C5	Valerylcarnitine	Valerylcarnitine	acylcarnitines	ok	C12H24NO4	HMDB0013128
C5-DC (C6-OH)	Glutarylcarnitine (Hydroxyhexanoylcarnitine)	Glutarylcarnitine	acylcarnitines	semi	C12H21NO6	HMDB0013130;HMDB0013131;HMDB0061633
C5-M-DC	Methylglutarylcarnitine	Methylglutarylcarnitine	acylcarnitines	semi	C13H23NO6	HMDB0000552;HMDB0061677
C5-OH (C3-DC-M)	Hydroxyvalerylcarnitine (Methylmalonylcarnitine)	Hydroxyvalerylcarnitine	acylcarnitines	semi	C12H25NO5	HMDB0013132
C5:1	Tiglylcarnitine	Tiglylcarnitine	acylcarnitines	semi	C12H21NO4	HMDB0002366
C5:1-DC	Glutaconylcarnitine	Glutaconylcarnitine	acylcarnitines	semi	C12H19NO6	HMDB0013129
C6 (C4:1-DC)	Hexanoylcarnitine (Fumarylcarnitine)	Hexanoylcarnitine	acylcarnitines	ok	C13H25NO4	HMDB0000756;HMDB0013134
C6:1	Hexenoylcarnitine	Hexenoylcarnitine	acylcarnitines	semi	C13H23NO4	HMDB0013161
C8	Octanoylcarnitine	Octanoylcarnitine	acylcarnitines	ok	C15H29NO4	HMDB0000791
C9	Nonaylcarnitine	Nonaylcarnitine	acylcarnitines	semi	C16H31NO4	HMDB0013288;HMDB0006320
H1	Hexose	Sugars	sugars	ok	NA	NA
lysoPC a C14:0	lysoPhosphatidylcholine acyl C14:0	LPC 14:0;PC O-14:0;LPC O-15:0	glycerophospholipids	semi	C22H46NO7P;C23H50NO6P	NA
lysoPC a C16:0	lysoPhosphatidylcholine acyl C16:0	LPC 16:0;PC O-16:0;LPC O-17:0	glycerophospholipids	semi	C24H50NO7P;C25H54NO6P	NA
lysoPC a C16:1	lysoPhosphatidylcholine acyl C16:1	LPC 16:1;PC O-17:1	glycerophospholipids	semi	C24H48NO7P;C25H52NO6P	NA
lysoPC a C17:0	lysoPhosphatidylcholine acyl C17:0	LPC 17:0;PC O-17:0;LPC O-18:0;PC 16:0	glycerophospholipids	semi	C25H52NO7P;C26H56NO6P;C24H48NO8P	NA
lysoPC a C18:0	lysoPhosphatidylcholine acyl C18:0	LPC 18:0;PC O-18:0;LPC O-19:0	glycerophospholipids	semi	C26H54NO7P;C27H58NO6P	NA
lysoPC a C18:1	lysoPhosphatidylcholine acyl C18:1	LPC 18:1;PC O-18:1	glycerophospholipids	semi	C26H52NO7P;C26H52NO7P	NA
lysoPC a C18:2	lysoPhosphatidylcholine acyl C18:2	LPC 18:2;PC O-19:2	glycerophospholipids	semi	C26H50NO7P;C27H54NO6P	NA
lysoPC a C20:3	lysoPhosphatidylcholine acyl C20:3	LPC 20:3	glycerophospholipids	semi	C28H52NO7P	NA
lysoPC a C20:4	lysoPhosphatidylcholine acyl C20:4	LPC 20:4	glycerophospholipids	semi	C28H50NO7P	NA
lysoPC a C24:0	lysoPhosphatidylcholine acyl C24:0	LPC 24:0	glycerophospholipids	semi	C32H66NO7P	NA
lysoPC a C26:0	lysoPhosphatidylcholine acyl C26:0	LPC 26:0;PC 25:0	glycerophospholipids	semi	C34H70NO7P;C33H66NO8P	NA
lysoPC a C26:1	lysoPhosphatidylcholine acyl C26:1	LPC 26:1;PC 25:1	glycerophospholipids	semi	C34H68NO7P;C33H64NO8P	NA
lysoPC a C28:0	lysoPhosphatidylcholine acyl C28:0	LPC 28:0;PC 27:0;PC O-28:0	glycerophospholipids	semi	C36H74NO7P;C35H70NO8P	NA
lysoPC a C28:1	lysoPhosphatidylcholine acyl C28:1	LPC 28:1;PC 27:1;PC O-28:1	glycerophospholipids	semi	C35H68NO8P;C36H72NO7P	NA
PC aa C24:0	Phosphatidylcholine diacyl C24:0	PC 24:0	glycerophospholipids	semi	C32H64NO8P	NA
PC aa C26:0	Phosphatidylcholine diacyl C26:0	PC 26:0	glycerophospholipids	semi	C34H68NO8P	NA
PC aa C28:1	Phosphatidylcholine diacyl C28:1	PC 28:1;PC O-29:1	glycerophospholipids	semi	C36H70NO8P	NA
PC aa C30:0	Phosphatidylcholine diacyl C30:0	PC 30:0;PC O-31:0	glycerophospholipids	semi	C38H76NO8P;C39H80NO7P	NA
PC aa C30:2	Phosphatidylcholine diacyl C30:2	PC 30:2;PC O-31:2	glycerophospholipids	semi	C38H72NO8P;C39H76NO7P	NA
PC aa C32:0	Phosphatidylcholine diacyl C32:0	PC 32:0;PC O-33:0	glycerophospholipids	semi	C40H80NO8P;C41H84NO7P	NA
PC aa C32:1	Phosphatidylcholine diacyl C32:1	PC 32:1;PC O-33:1	glycerophospholipids	semi	C40H78NO8P;C41H82NO7P	NA
PC aa C32:2	Phosphatidylcholine diacyl C32:2	PC 32:2;PC O-33:2	glycerophospholipids	semi	C40H76NO8P;C41H80NO7P	NA
PC aa C32:3	Phosphatidylcholine diacyl C32:3	PC 32:3;PC O-33:3	glycerophospholipids	semi	C40H74NO8P;C41H78NO7P	NA
PC aa C34:1	Phosphatidylcholine diacyl C34:1	PC 34:1;PC O-35:1	glycerophospholipids	semi	C42H82NO8P;C43H86NO7P	NA
PC aa C34:2	Phosphatidylcholine diacyl C34:2	PC 34:2;PC O- 35:2	glycerophospholipids	semi	C42H80NO8P;C43H84NO7P	NA
PC aa C34:3	Phosphatidylcholine diacyl C34:3	PC 34:3;PC O-35:3	glycerophospholipids	semi	C42H78NO8P;C43H82NO7P	NA
PC aa C34:4	Phosphatidylcholine diacyl C34:4	PC 34:4;PC O-35:4	glycerophospholipids	semi	C42H76NO8P	NA
PC aa C36:0	Phosphatidylcholine diacyl C36:0	PC 36:0;PC 37:7;PC O-37:0;PC O-38:7	glycerophospholipids	semi	C44H88NO8P;C45H76NO8P;C45H92NO7P;C46H80NO7P	NA
PC aa C36:1	Phosphatidylcholine diacyl C36:1	PC 36:1;PC O-37:1	glycerophospholipids	semi	C44H86NO8P;C45H90NO7P	NA
PC aa C36:2	Phosphatidylcholine diacyl C36:2	PC 36:2;PC O-37:2	glycerophospholipids	semi	C44H84NO8P;C45H88NO7P	NA
PC aa C36:3	Phosphatidylcholine diacyl C36:3	PC 36:3;PC O-37:3	glycerophospholipids	semi	C44H82NO8P;C45H86NO7P	NA
PC aa C36:4	Phosphatidylcholine diacyl C36:4	PC 36:4;PC O-37:4	glycerophospholipids	semi	C44H80NO8P;C45H84NO7P	NA
PC aa C36:5	Phosphatidylcholine diacyl C36:5	PC 36:5	glycerophospholipids	semi	C45H84NO7P	NA
PC aa C36:6	Phosphatidylcholine diacyl C36:6	PC 36:6	glycerophospholipids	semi	C44H76NO8P	NA
PC aa C38:0	Phosphatidylcholine diacyl C38:0	PC 38:0;PC O-39:0;PC O-40:7	glycerophospholipids	semi	C46H92NO8P;C47H96NO7P;C48H84NO7P	NA
PC aa C38:1	Phosphatidylcholine diacyl C38:1	PC 38:1;PC 39:8;PC O-39:1	glycerophospholipids	semi	C46H90NO8P;C47H78NO8P;C47H94NO7P	NA
PC aa C38:3	Phosphatidylcholine diacyl C38:3	PC 38:3	glycerophospholipids	semi	C46H86NO8P	NA
PC aa C38:4	Phosphatidylcholine diacyl C38:4	PC 38:4	glycerophospholipids	semi	C47H94NO7P	NA
PC aa C38:5	Phosphatidylcholine diacyl C38:5	PC 38:5	glycerophospholipids	semi	C46H82NO8P	NA
PC aa C38:6	Phosphatidylcholine diacyl C38:6	PC 38:6	glycerophospholipids	semi	C46H80NO8P	NA
PC aa C40:1	Phosphatidylcholine diacyl C40:1	PC 40:1;PC O-41:1	glycerophospholipids	semi	C48H94NO8P;C49H98NO7P	NA
PC aa C40:2	Phosphatidylcholine diacyl C40:2	PC 40:2	glycerophospholipids	semi	C48H92NO8P	NA
PC aa C40:3	Phosphatidylcholine diacyl C40:3	PC 40:3	glycerophospholipids	semi	C48H90NO8P	NA
PC aa C40:4	Phosphatidylcholine diacyl C40:4	PC 40:4	glycerophospholipids	semi	C48H88NO8P	NA
PC aa C40:5	Phosphatidylcholine diacyl C40:5	PC 40:5	glycerophospholipids	semi	C48H86NO8P	NA
PC aa C40:6	Phosphatidylcholine diacyl C40:6	PC 40:6	glycerophospholipids	semi	C48H84NO8P	NA
PC aa C42:0	Phosphatidylcholine diacyl C42:0	PC 42:0	glycerophospholipids	semi	PC 42:0	NA
PC aa C42:1	Phosphatidylcholine diacyl C42:1	PC 42:1	glycerophospholipids	semi	C50H98NO8P	NA
PC aa C42:2	Phosphatidylcholine diacyl C42:2	PC 42:2	glycerophospholipids	semi	C50H96NO8P	NA
PC aa C42:4	Phosphatidylcholine diacyl C42:4	PC 42:4	glycerophospholipids	semi	C50H92NO8P	NA
PC aa C42:5	Phosphatidylcholine diacyl C42:5	PC 42:5	glycerophospholipids	semi	C50H90NO8P	NA
PC aa C42:6	Phosphatidylcholine diacyl C42:6	PC 42:6	glycerophospholipids	semi	C50H88NO8P	NA
PC ae C30:0	Phosphatidylcholine acyl-alkyl C30:0	PC O-30:0;PC 29:0	glycerophospholipids	semi	C38H78NO7P;C37H74NO8P	NA
PC ae C30:1	Phosphatidylcholine acyl-alkyl C30:1	PC O-30:1;PC 29:1	glycerophospholipids	semi	C38H76NO7P;C37H72NO8P	NA
PC ae C30:2	Phosphatidylcholine acyl-alkyl C30:2	PC O-30:2;PC 29:2	glycerophospholipids	semi	C38H74NO7P;C37H70NO8P	NA
PC ae C32:1	Phosphatidylcholine acyl-alkyl C32:1	PC O-32:1;PC 31:1	glycerophospholipids	semi	C40H80NO7P;C39H76NO8P	NA
PC ae C32:2	Phosphatidylcholine acyl-alkyl C32:2	PC O-32:2;PC 31:2	glycerophospholipids	semi	C40H78NO7P;C39H74NO8P	NA
PC ae C34:0	Phosphatidylcholine acyl-alkyl C34:0	PC O-34:0;PC 33:0	glycerophospholipids	semi	C42H86NO7P;C41H82NO8P	NA
PC ae C34:1	Phosphatidylcholine acyl-alkyl C34:1	PC O-34:1;PC 33:1	glycerophospholipids	semi	C42H84NO7P;C41H80NO8P	NA
PC ae C34:2	Phosphatidylcholine acyl-alkyl C34:2	PC O-34:2;PC 33:2	glycerophospholipids	semi	C42H82NO7P;C41H78NO8P	NA
PC ae C34:3	Phosphatidylcholine acyl-alkyl C34:3	PC O-34:3;PC 33:3	glycerophospholipids	semi	C42H80NO7P;C41H76NO8P	NA
PC ae C36:0	Phosphatidylcholine acyl-alkyl C36:0	PC O-36:0;PC 35:0;PC 36:7	glycerophospholipids	semi	C44H90NO7P;C43H86NO8P;C44H74NO8P	NA
PC ae C36:1	Phosphatidylcholine acyl-alkyl C36:1	PC O-36:1;PC 35:1;PC 36:8	glycerophospholipids	semi	C44H88NO7P;C43H84NO8P;C45H84NO7P	NA
PC ae C36:2	Phosphatidylcholine acyl-alkyl C36:2	PC O-36:2;PC 35:2	glycerophospholipids	semi	C44H86NO7P;C43H82NO8P	NA
PC ae C36:3	Phosphatidylcholine acyl-alkyl C36:3	PC O-36:3;PC 35:3	glycerophospholipids	semi	C44H84NO7P;C43H80NO8P	NA
PC ae C36:4	Phosphatidylcholine acyl-alkyl C36:4	PC O-36:4;PC 35:4	glycerophospholipids	semi	C44H82NO7P;C43H78NO8P	NA
PC ae C36:5	Phosphatidylcholine acyl-alkyl C36:5	PC O-36:5;PC 35:5	glycerophospholipids	semi	C44H80NO7P;C43H76NO8P	NA
PC ae C38:0	Phosphatidylcholine acyl-alkyl C38:0	PC O-38:0;PC 37:0;PC 38:7	glycerophospholipids	semi	C46H94NO7P;C45H90NO8P;C46H78NO8P	NA
PC ae C38:1	Phosphatidylcholine acyl-alkyl C38:1	PC O-38:1;PC 37:1;PC 38:8	glycerophospholipids	semi	C46H92NO7P;C45H88NO8P;C46H76NO8P	NA
PC ae C38:2	Phosphatidylcholine acyl-alkyl C38:2	PC O-38:2;PC 37:2;PC 38:9	glycerophospholipids	semi	C46H90NO7P;C45H86NO8P;C46H74NO8P	NA
PC ae C38:3	Phosphatidylcholine acyl-alkyl C38:3	PC O-38:3;PC 37:3	glycerophospholipids	semi	C46H88NO7P;C45H84NO8P	NA
PC ae C38:4	Phosphatidylcholine acyl-alkyl C38:4	PC O-38:4;PC 37:4	glycerophospholipids	semi	C46H86NO7P;C45H82NO8P	NA
PC ae C38:5	Phosphatidylcholine acyl-alkyl C38:5	PC O-38:5;PC 37:5	glycerophospholipids	semi	C46H84NO7P;C45H80NO8P	NA
PC ae C38:6	Phosphatidylcholine acyl-alkyl C38:6	PC O-38:6;PC 37:6	glycerophospholipids	semi	C46H82NO7P;C45H78NO8P	NA
PC ae C40:1	Phosphatidylcholine acyl-alkyl C40:1	PC O-40:1;PC 39:1;PC 40:8	glycerophospholipids	semi	C48H96NO7P;C47H92NO8P;C48H80NO8P	NA
PC ae C40:2	Phosphatidylcholine acyl-alkyl C40:2	PC O-40:2;PC 39:2;PC 40:9	glycerophospholipids	semi	C48H94NO7P;C47H90NO8P;C48H78NO8P	NA
PC ae C40:3	Phosphatidylcholine acyl-alkyl C40:3	PC O-40:3;PC 39:3;PC 40:10	glycerophospholipids	semi	C48H92NO7P;C47H88NO8P;C48H76NO8P	NA
PC ae C40:4	Phosphatidylcholine acyl-alkyl C40:4	PC O-40:4;PC 39:4	glycerophospholipids	semi	C48H90NO7P;C47H86NO8P	NA
PC ae C40:5	Phosphatidylcholine acyl-alkyl C40:5	PC O-40:5;PC 39:5	glycerophospholipids	semi	C48H88NO7P;C47H84NO8P	NA
PC ae C40:6	Phosphatidylcholine acyl-alkyl C40:6	PC O-40:6;PC 39:6	glycerophospholipids	semi	C48H86NO7P;C47H82NO8P	NA
PC ae C42:0	Phosphatidylcholine acyl-alkyl C42:0	PC O-42:0;PC 41:0;PC 42:7	glycerophospholipids	semi	C50H102NO7P;C49H98NO8P;C50H86NO8P	NA
PC ae C42:1	Phosphatidylcholine acyl-alkyl C42:1	PC O-42:1;PC 40:1;PC 42:8	glycerophospholipids	semi	C50H100NO7P;C49H96NO8P	NA
PC ae C42:2	Phosphatidylcholine acyl-alkyl C42:2	PC O-42:2;PC 41:2;PC 42:9	glycerophospholipids	semi	C50H98NO7P;C49H94NO8P;C50H82NO8P	NA
PC ae C42:3	Phosphatidylcholine acyl-alkyl C42:3	PC O-42:3;PC 41:3;PC 42:10	glycerophospholipids	semi	C50H96NO7P;C49H92NO8P;C50H80NO8P	NA
PC ae C42:4	Phosphatidylcholine acyl-alkyl C42:4	PC O-42:4;PC 41:4;PC 42:11	glycerophospholipids	semi	C50H94NO7P;C49H90NO8P;C50H78NO8P	NA
PC ae C42:5	Phosphatidylcholine acyl-alkyl C42:5	PC O-42:5;PC 41:5	glycerophospholipids	semi	C50H92NO7P;C49H88NO8P	NA
PC ae C44:3	Phosphatidylcholine acyl-alkyl C44:3	PC O-44:3;PC 44:10	glycerophospholipids	semi	C52H100NO7P;C52H84NO8P	NA
PC ae C44:4	Phosphatidylcholine acyl-alkyl C44:4	PC O-44:4;PC 43:4	glycerophospholipids	semi	C52H98NO7P;C51H94NO8P	NA
PC ae C44:5	Phosphatidylcholine acyl-alkyl C44:5	PC O-44:5;PC 44:12	glycerophospholipids	semi	C52H96NO7P;C52H80NO8P	NA
PC ae C44:6	Phosphatidylcholine acyl-alkyl C44:6	PC O-44:6;PC 43:6	glycerophospholipids	semi	C52H94NO7P;C51H90NO8P	NA
SM (OH) C14:1	Hydroxysphingomyeline C14:1	SM OH-32:2;SM 33:1	sphingolipids	semi	C38H77N2O6P	NA
SM (OH) C16:1	Hydroxysphingomyeline C16:1	SM OH-34:2;SM 35:1	sphingolipids	semi	C40H81N2O6P	NA
SM (OH) C22:1	Hydroxysphingomyeline C22:1	SM OH-40:2;SM 41:1	sphingolipids	semi	C46H93N2O6P	NA
SM (OH) C22:2	Hydroxysphingomyeline C22:2	SM OH-40:3;SM 41:2	sphingolipids	semi	C46H91N2O6P	NA
SM (OH) C24:1	Hydroxysphingomyeline C24:1	SM OH-42:2;SM 43:1	sphingolipids	semi	C48H97N2O6P	NA
SM C16:0	Sphingomyeline C16:0	SM 34:1	sphingolipids	semi	C39H79N2O6P	NA
SM C16:1	Sphingomyeline C16:1	SM 34:2	sphingolipids	semi	C39H77N2O6P	NA
SM C18:0	Sphingomyeline C18:0	SM 36:1	sphingolipids	semi	C41H83N2O6P	NA
SM C18:1	Sphingomyeline C18:1	SM 36:2	sphingolipids	semi	C41H81N2O6P	NA
SM C20:2	Sphingomyeline C20:2	SM 38:3	sphingolipids	semi	C43H83N2O6P	NA
SM C24:0	Sphingomyeline C24:0	SM 42:1	sphingolipids	semi	C47H95N2O6P	NA
SM C24:1	Sphingomyeline C24:1	SM 42:2	sphingolipids	semi	C47H93N2O6P	NA
SM C26:0	Sphingomyeline C26:0	SM 44:1	sphingolipids	semi	C49H99N2O6P	NA
SM C26:1	Sphingomyeline C26:1	SM 44:2	sphingolipids	semi	C49H97N2O6P	NA

## Sheet: Table S2
Table S2. Predefined sums investigated at significant index variants.
trait name	summands (sum)	description	metabolic_significance
tAC	C0; C10; C10:1; C10:2; C12; C12-DC; C12:1; C14; C14:1; C14:1-OH; C14:2; C14:2-OH; C16; C16-OH; C16:1; C16:1-OH; C16:2; C16:2-OH; C18; C18:1; C18:1-OH; C18:2; C2; C3; C3-OH; C3:1; C4; C3-DC (C4-OH); C4:1; C5; C5-M-DC; C5-OH (C3-DC-M); C5:1; C5:1-DC; C6 (C4:1-DC); C5-DC (C6-OH); C6:1; C7-DC; C8; C9	Sum of acylcarnitines
tACDC	C12-DC; C3-DC (C4-OH); C5-M-DC; C5-OH (C3-DC-M); C5:1-DC; C6 (C4:1-DC); C5-DC (C6-OH); C7-DC	Sum of dicarboxy-acylcarnitines
tACOH	C14:1-OH; C14:2-OH; C16-OH; C16:1-OH; C16:2-OH; C18:1-OH; C3-OH; C3-DC (C4-OH); C5-OH (C3-DC-M); C5-DC (C6-OH)	Sum of acylcarnitines OH
tADMASDMA	ADMA; SDMA	ADMA + SDMA
tAromAA	His; Phe; Trp; Tyr	Sum of aromatic AA
tBCAA	Ile; Leu; Val	Sum of branched amino acids	Indicator of short-term metabolic control (analogy with muscular insulin resistance)
tC16C18	C16; C18	C16 + C18
tC2C3	C2; C3	C2 + C3
tEssentAA	His; Ile; Leu; Lys; Met; Phe; Thr; Trp; Val	Sum of essential amino acids	Indicator of nutritional status
tGlucoAA_B	Ala; Arg; Asn; Asp; Gln; Gly; His; Met; Pro; Ser; Val; Phe; Ile; Thr; Trp; Tyr	Sum of selected glucogenic amino acids (Biocrates; without Cys)	Indicator of balance between glycolysis and gluconeogenesis
tGlucoAA_selected	Ala; Gly; Ser	Sum of selected glucogenic amino acids (alanine, glycine, serine)	Indicator of balance between glycolysis and gluconeogenesis
tLyso	lysoPC a C14:0; lysoPC a C16:0; lysoPC a C16:1; lysoPC a C17:0; lysoPC a C18:0; lysoPC a C18:1; lysoPC a C18:2; lysoPC a C20:3; lysoPC a C20:4; lysoPC a C24:0; lysoPC a C26:0; lysoPC a C26:1; lysoPC a C28:0; lysoPC a C28:1	Sum lysoglycerophosphocholines
tLysoPC	lysoPC a C14:0; lysoPC a C16:0; lysoPC a C16:1; lysoPC a C17:0; lysoPC a C18:0; lysoPC a C18:1; lysoPC a C18:2; lysoPC a C20:3; lysoPC a C20:4; lysoPC a C24:0; lysoPC a C26:0; lysoPC a C26:1; lysoPC a C28:0; lysoPC a C28:1; PC aa C24:0; PC aa C26:0; PC aa C28:1; PC aa C30:0; PC aa C30:2; PC aa C32:0; PC aa C32:1; PC aa C32:2; PC aa C32:3; PC aa C34:1; PC aa C34:2; PC aa C34:3; PC aa C34:4; PC aa …	Sum of all LysoPC
tLysoPCSM	lysoPC a C14:0; lysoPC a C16:0; lysoPC a C16:1; lysoPC a C17:0; lysoPC a C18:0; lysoPC a C18:1; lysoPC a C18:2; lysoPC a C20:3; lysoPC a C20:4; lysoPC a C24:0; lysoPC a C26:0; lysoPC a C26:1; lysoPC a C28:0; lysoPC a C28:1; PC aa C24:0; PC aa C26:0; PC aa C28:1; PC aa C30:0; PC aa C30:2; PC aa C32:0; PC aa C32:1; PC aa C32:2; PC aa C32:3; PC aa C34:1; PC aa C34:2; PC aa C34:3; PC aa C34:4; PC aa …	Sum of all LysoPC + all SM
tMUFA_LysoPC	lysoPC a C16:1; lysoPC a C18:1; lysoPC a C26:1; lysoPC a C28:1; PC aa C28:1; PC aa C32:1; PC aa C34:1; PC aa C36:1; PC aa C38:1; PC aa C40:1; PC aa C42:1; PC ae C30:1; PC ae C32:1; PC ae C34:1; PC ae C36:1; PC ae C38:1; PC ae C40:1; PC ae C42:1	Sum of monounsaturated glycerophosphocholine inclusing Lyso
tMUFA_PC	PC aa C28:1; PC aa C32:1; PC aa C34:1; PC aa C36:1; PC aa C38:1; PC aa C40:1; PC aa C42:1; PC ae C30:1; PC ae C32:1; PC ae C34:1; PC ae C36:1; PC ae C38:1; PC ae C40:1; PC ae C42:1	Sum of monounsaturated glycerophosphocholine without Lyso
tNonEssentAA_B	Arg; Gln; Gly; Pro; Tyr; Ala; Asp; Asn; Glu; Ser	Sum of non-essentila amino acids (Biocrates; without Cys)	Indicator of metabolic/catabolic state
tPC	PC aa C24:0; PC aa C26:0; PC aa C28:1; PC aa C30:0; PC aa C30:2; PC aa C32:0; PC aa C32:1; PC aa C32:2; PC aa C32:3; PC aa C34:1; PC aa C34:2; PC aa C34:3; PC aa C34:4; PC aa C36:0; PC aa C36:1; PC aa C36:2; PC aa C36:3; PC aa C36:4; PC aa C36:5; PC aa C36:6; PC aa C38:0; PC aa C38:1; PC aa C38:3; PC aa C38:4; PC aa C38:5; PC aa C38:6; PC aa C40:1; PC aa C40:2; PC aa C40:3; PC aa C40:4; PC aa C40…	Sum of all PC
tPCaa	PC aa C24:0; PC aa C26:0; PC aa C28:1; PC aa C30:0; PC aa C30:2; PC aa C32:0; PC aa C32:1; PC aa C32:2; PC aa C32:3; PC aa C34:1; PC aa C34:2; PC aa C34:3; PC aa C34:4; PC aa C36:0; PC aa C36:1; PC aa C36:2; PC aa C36:3; PC aa C36:4; PC aa C36:5; PC aa C36:6; PC aa C38:0; PC aa C38:1; PC aa C38:3; PC aa C38:4; PC aa C38:5; PC aa C38:6; PC aa C40:1; PC aa C40:2; PC aa C40:3; PC aa C40:4; PC aa C40…	Sum of all PCaa (PC with two fatty acids)
tPCae	PC ae C30:0; PC ae C30:1; PC ae C30:2; PC ae C32:1; PC ae C32:2; PC ae C34:0; PC ae C34:1; PC ae C34:2; PC ae C34:3; PC ae C36:0; PC ae C36:1; PC ae C36:2; PC ae C36:3; PC ae C36:4; PC ae C36:5; PC ae C38:0; PC ae C38:1; PC ae C38:2; PC ae C38:3; PC ae C38:4; PC ae C38:5; PC ae C38:6; PC ae C40:1; PC ae C40:2; PC ae C40:3; PC ae C40:4; PC ae C40:5; PC ae C40:6; PC ae C42:0; PC ae C42:1; PC ae C42…	Sum of all PCae (Plasmalogens)
tPCSM	PC aa C24:0; PC aa C26:0; PC aa C28:1; PC aa C30:0; PC aa C30:2; PC aa C32:0; PC aa C32:1; PC aa C32:2; PC aa C32:3; PC aa C34:1; PC aa C34:2; PC aa C34:3; PC aa C34:4; PC aa C36:0; PC aa C36:1; PC aa C36:2; PC aa C36:3; PC aa C36:4; PC aa C36:5; PC aa C36:6; PC aa C38:0; PC aa C38:1; PC aa C38:3; PC aa C38:4; PC aa C38:5; PC aa C38:6; PC aa C40:1; PC aa C40:2; PC aa C40:3; PC aa C40:4; PC aa C40…	Sum of all PC + all SM
tPheTyr	Phe; Tyr	Sum of Phe and Tyr
tPUFA_LysoPC	lysoPC a C18:2; lysoPC a C20:3; lysoPC a C20:4; PC aa C30:2; PC aa C32:2; PC aa C32:3; PC aa C34:2; PC aa C34:3; PC aa C34:4; PC aa C36:2; PC aa C36:3; PC aa C36:4; PC aa C36:5; PC aa C36:6; PC aa C38:3; PC aa C38:4; PC aa C38:5; PC aa C38:6; PC aa C40:2; PC aa C40:3; PC aa C40:4; PC aa C40:5; PC aa C40:6; PC aa C42:2; PC aa C42:4; PC aa C42:5; PC aa C42:6; PC ae C30:2; PC ae C32:2; PC ae C34:2; …	Sum of polyunsaturated glycerophosphocholine including Lyso
tPUFA_PC	PC aa C30:2; PC aa C32:2; PC aa C32:3; PC aa C34:2; PC aa C34:3; PC aa C34:4; PC aa C36:2; PC aa C36:3; PC aa C36:4; PC aa C36:5; PC aa C36:6; PC aa C38:3; PC aa C38:4; PC aa C38:5; PC aa C38:6; PC aa C40:2; PC aa C40:3; PC aa C40:4; PC aa C40:5; PC aa C40:6; PC aa C42:2; PC aa C42:4; PC aa C42:5; PC aa C42:6; PC ae C30:2; PC ae C32:2; PC ae C34:2; PC ae C34:3; PC ae C36:2; PC ae C36:3; PC ae C36…	Sum of polyunsaturated glycerophosphocholine without Lyso
tSFA_LysoPC	lysoPC a C14:0; lysoPC a C16:0; lysoPC a C17:0; lysoPC a C18:0; lysoPC a C24:0; lysoPC a C26:0; lysoPC a C28:0; PC aa C24:0; PC aa C26:0; PC aa C30:0; PC aa C32:0; PC aa C36:0; PC aa C38:0; PC aa C42:0; PC ae C30:0; PC ae C34:0; PC ae C36:0; PC ae C38:0; PC ae C42:0	Sum of saturated glycerophosphocholine including Lyso	Indicator of nutritional lipid composition
tSFA_PC	PC aa C24:0; PC aa C26:0; PC aa C30:0; PC aa C32:0; PC aa C36:0; PC aa C38:0; PC aa C42:0; PC ae C30:0; PC ae C34:0; PC ae C36:0; PC ae C38:0; PC ae C42:0	Sum of saturated glycerophosphocholine without Lyso	Indicator of nutritional lipid composition
tSM	SM (OH) C14:1; SM (OH) C16:1; SM (OH) C22:1; SM (OH) C22:2; SM (OH) C24:1; SM C16:0; SM C16:1; SM C18:0; SM C18:1; SM C20:2; SM C22:3; SM C24:0; SM C24:1; SM C26:0; SM C26:1	Sum all sphingomyelins
tSMnotOH	SM C16:0; SM C16:1; SM C18:0; SM C18:1; SM C20:2; SM C22:3; SM C24:0; SM C24:1; SM C26:0; SM C26:1	Sum SM
tSMOH	SM (OH) C14:1; SM (OH) C16:1; SM (OH) C22:1; SM (OH) C22:2; SM (OH) C24:1	Sum SM-OH

## Sheet: Table S3
Table S3. Predefined ratios investigated at significant index variants.
trait name	numerator name (ratio)	denominator name (ratio)	description	metabolic_significance
ADMA/Arg	ADMA	Arg	Ratio of asymmetrically dimethylated arginine to total unmodified arginine	Inhibition of NO synthase, associated with endothelial dysfunction and cardiovascular risk in general
C2/C0	C2	C0	Ratio of acetylcarnitine to free carnitine	Measure of beta-oxidation of even numbered fatty acids
Cit/Arg	Cit	Arg	Ratio of citrulline to arginine	Activity of nitric oxide synthase (NOS)
Cit/Orn	Cit	Orn	Ratio of citrulline to ornithine	Activity of onithine carbamoylphosphate transferase
Fischer_ratio	tBCAA	tPheTyr	Fisher ratio	NA
Kynurenine/Trp	Kynurenine	Trp	Ratio of kyneurine to tryptophan	Rate of Trp degradation to niacin, indicator of indole dioxygenase activity (immunosuppression/tolerance)
Met-SO/Met	Met-SO	Met	Ratio of sulfoxide methionine to total unmodified methionine	Measure of oxidative stress
Orn/Arg	Orn	Arg	Ratio of ornithine to arginine	Activity of arginase
Putrescine/Orn	Putrescine	Orn	Ratio of putrescine to ornithine	Activity of ornithine decarboxylase
SDMA/Arg	SDMA	Arg	Ratio of symmetrically dimethylated arginine to total unmodified arginine	Indicator of impaired kidney function/renal function
Serotonin/Trp	Serotonin	Trp	Ratio of serotonin to tryptophan	Rate of Trp degradation to serotonin
Spermidine/Putrescine	Spermidine	Putrescine	Ratio of spermidine to putrescine	Activity of spermidine synthase
Spermine/Spermidine	Spermine	Spermidine	Ratio of spermine to spermidine	Activity of spermine synthase
tAC/C0	tAC	C0	Ratio of total acylcarnitine to C0
tACDC/tAC	tACDC	tAC	Ratio of dicarboxy-acylcarnitines to total acylcarnitine	Indicator of omega-oxidation of fatty acids
tACOH/tAC	tACOH	tAC	Ratio of ACOH to total acylcarnitine
tADMASDMA/Arg	tADMASDMA	Arg	Ratio of total dymethylated arginine to total unmodified arginine	Activity of protein arginine methyl transferases
tBCAA/tAromAA	tBCAA	tAromAA	Ratio between sum of branched Chain AA to sum of aromatic AA	Indicator of liver damage
tC16C18/C0	tC16C18	C0	Ratio of C16 C18 to C0
tC2C3/C0	tC2C3	C0	Ratio of short chain acetylcanitine to free carnitine	Activity of carnitine palmitoyltransferase I, rate-limiting step in the uptake of fatty acids into mitochondria
tLyso/tLysoPC	tLyso	tLysoPC	Ratio of lysoglycerophosphocholines to glycerophosphocholines	Indicator of phospholipase activity
tLysoPC/tPC	tLysoPC	tPC	Ratio of lysoglycerophosphocholines to glycerophosphocholines	Indicator of phospholipase activity
tMUFA_LysoPC/tSFA_LysoPC	tMUFA_LysoPC	tSFA_LysoPC	Ratio of monounsaturated to saturated glycerophosphocholines	Measure of the activity of fatty acid desaturases and indicator of nutritional lipid composition
tMUFA_LysoPC/tSFA_PC	tMUFA_LysoPC	tSFA_PC	Ratio of monounsaturated to saturated glycerophosphocholines	Measure of the activity of fatty acid desaturases and indicator of nutritional lipid composition
tMUFA_PC/tSFA_LysoPC	tMUFA_PC	tSFA_LysoPC	Ratio of monounsaturated to saturated glycerophosphocholines	Measure of the activity of fatty acid desaturases and indicator of nutritional lipid composition
tMUFA_PC/tSFA_PC	tMUFA_PC	tSFA_PC	Ratio of monounsaturated to saturated glycerophosphocholines	Measure of the activity of fatty acid desaturases and indicator of nutritional lipid composition
tPUFA_LysoPC/tMUFA_LysoPC	tPUFA_LysoPC	tMUFA_LysoPC	Ratio of polyunsaturated to monounsaturated glycerophosphocholine	Measure of the activity of fatty acid desaturases and indicator of nutritional lipid composition
tPUFA_PC/tMUFA_PC	tPUFA_PC	tMUFA_PC	Ratio of polyunsaturated to monounsaturated glycerophosphocholine	Measure of the activity of fatty acid desaturases and indicator of nutritional lipid composition
tPUFA_PC/tSFA_LysoPC	tPUFA_PC	tSFA_LysoPC	Ratio of polyunsaturated to saturated glycerophosphocholine	Measure of the activity of fatty acid desaturases and indicator of nutritional lipid composition
tPUFA_PC/tSFA_PC	tPUFA_PC	tSFA_PC	Ratio of polyunsaturated to saturated glycerophosphocholine	Measure of the activity of fatty acid desaturases and indicator of nutritional lipid composition
tSM/tLysoPC	tSM	tPC	Ratio of total sphingomielins to total phosphocholines
tSM/tLysoPCSM	tSM	tLysoPCSM	Ratio of total sphingomielins to total phosphocholines
tSM/tPC	tSM	tPC	Ratio of total sphingomielins to total phosphocholines
tSM/tPCSM	tSM	tPCSM	Ratio of total sphingomielins to total phosphocholines and sphingomielins
tSMOH/tSMnotOH	tSMOH	tSMnotOH	Ratio of SM OH to SM not OH
Tyr/Phe	Tyr	Phe	Ratio of thyrosine to phenylalanine	Activity of phenylalanine hydroxylase

## Sheet: Table S4
Table S4: Locus-trait associations conditionally or unconditionally significant at a 5.5x10-9 threshold in at the WES combined dataset, with results given for WES and WES imputed at the best variant at the locus		Table S4: Locus-trait associations conditionally or unconditionally significant at a 5.5x10-9 threshold in at the WES combined dataset, with results given for WES and WES imputed at the best variant at the locus
							WES			WES imputed			WES combined
Trait name	Trait code	Gene	Dataset	Best variant in dataset	rsID	Effect	PVALUE	MAF	Beta	PVALUE	MAF	Beta	PVALUE	MAF	Beta	PVALUE conditional
Serine	Ser	MTHFR	WES	1:11856378_G/A	rs1801133	missense_variant	0.0001785	0.40376	-0.09744	NA	NA	NA	3.447e-08	0.40516	-0.113	3.972e-09
Serine	Ser	KIAA2013	WES imputed	1:11982544_T/C	rs2639453	3_prime_UTR_variant	0.572	0.27322	0.01625	0.001604	0.27175	0.1121	0.01382	0.27244	0.05644	0.009464
Serine	Ser	MTHFR	WES combined	1:11856378_G/A	rs1801133	missense_variant	0.0001785	0.40376	-0.09744	NA	NA	NA	3.447e-08	0.40516	-0.113	3.972e-09
Spermidine	Spermidine	TRIM58	WES	1:248039451_C/T	rs3811444	missense_variant	5.33e-24	0.35474	0.2797	2.046e-18	0.34494	0.2741	7.028e-39	0.35098	0.2769	0.1
Spermidine	Spermidine	TRIM58	WES imputed	1:248039451_C/T	rs3811444	missense_variant	5.33e-24	0.35474	0.2797	2.046e-18	0.34494	0.2741	7.028e-39	0.35098	0.2769	0.1
Spermidine	Spermidine	TRIM58	WES combined	1:248039451_C/T	rs3811444	missense_variant	5.33e-24	0.35474	0.2797	2.046e-18	0.34494	0.2741	7.028e-39	0.35098	0.2769	0.1
lysoPhosphatidylcholine acyl C16:0	lysoPC a C16:0	GCKR	WES	2:27730940_T/C	rs1260326	missense_variant&splice_region_variant	5.25e-06	0.43594	-0.1204	NA	NA	NA	3.819e-11	0.4494	-0.1341	0.15
lysoPhosphatidylcholine acyl C16:0	lysoPC a C16:0	SNX17	WES imputed	2:27598097_T/C	rs4665972	intron_variant	0.0001499	0.44668	-0.09582	4.476e-06	0.47522	-0.1429	3.677e-09	0.45639	-0.119	0.25
lysoPhosphatidylcholine acyl C16:0	lysoPC a C16:0	GCKR	WES combined	2:27730940_T/C	rs1260326	missense_variant&splice_region_variant	5.25e-06	0.43594	-0.1204	NA	NA	NA	3.819e-11	0.4494	-0.1341	0.15
lysoPhosphatidylcholine acyl C16:1	lysoPC a C16:1	GCKR	WES	2:27730940_T/C	rs1260326	missense_variant&splice_region_variant	1.625e-08	0.43594	-0.1489	NA	NA	NA	2.231e-13	0.4494	-0.1482	0.1
lysoPhosphatidylcholine acyl C16:1	lysoPC a C16:1	SNX17	WES imputed	2:27598097_T/C	rs4665972	intron_variant	1.448e-06	0.44668	-0.1214	2.73e-06	0.47522	-0.1479	1.761e-11	0.45639	-0.1352	0.25
lysoPhosphatidylcholine acyl C16:1	lysoPC a C16:1	GCKR	WES combined	2:27730940_T/C	rs1260326	missense_variant&splice_region_variant	1.625e-08	0.43594	-0.1489	NA	NA	NA	2.231e-13	0.4494	-0.1482	0.1
lysoPhosphatidylcholine acyl C20:3	lysoPC a C20:3	GCKR	WES	2:27730940_T/C	rs1260326	missense_variant&splice_region_variant	5.188e-05	0.43594	-0.1039	NA	NA	NA	3.659e-09	0.4494	-0.1186	0.1
lysoPhosphatidylcholine acyl C20:3	lysoPC a C20:3	SNX17	WES imputed	2:27598097_T/C	rs4665972	intron_variant	0.0006501	0.44668	-0.08378	1.921e-05	0.47522	-0.1364	2.014e-08	0.45639	-0.1122	0.25
lysoPhosphatidylcholine acyl C20:3	lysoPC a C20:3	GCKR	WES combined	2:27730940_T/C	rs1260326	missense_variant&splice_region_variant	5.188e-05	0.43594	-0.1039	NA	NA	NA	3.659e-09	0.4494	-0.1186	0.1
Phosphatidylcholine diacyl C34:4	PC aa C34:4	GCKR	WES	2:27730940_T/C	rs1260326	missense_variant&splice_region_variant	7.47e-06	0.43594	-0.1205	NA	NA	NA	3.079e-09	0.4494	-0.1209	0.1
Phosphatidylcholine diacyl C34:4	PC aa C34:4	SNX17	WES imputed	2:27598097_T/C	rs4665972	intron_variant	0.0001462	0.44668	-0.09749	0.0002284	0.47522	-0.1134	4.488e-08	0.45639	-0.111	0.25
Phosphatidylcholine diacyl C34:4	PC aa C34:4	GCKR	WES combined	2:27730940_T/C	rs1260326	missense_variant&splice_region_variant	7.47e-06	0.43594	-0.1205	NA	NA	NA	3.079e-09	0.4494	-0.1209	0.1
Hexose	H1	ABCB11	WES	2:169801488_A/G	rs853789	intron_variant	5.396e-06	0.31491	0.1261	1.044e-05	0.31779	0.1362	8.354e-10	0.31477	0.1286	9.303e-10
Hexose	H1	ABCB11	WES imputed	2:169801488_A/G	rs853789	intron_variant	5.396e-06	0.31491	0.1261	1.044e-05	0.31779	0.1362	8.354e-10	0.31477	0.1286	9.303e-10
Hexose	H1	G6PC2	WES combined	2:169763148_T/C	rs560887	intron_variant&NMD_transcript_variant	NA	NA	NA	NA	NA	NA	1.854e-11	0.25945	0.1497	2.014e-11
Aspartate	Asp	ENPEP	WES	4:111398208_A/G	rs10004516	missense_variant	0.0002055	0.12052	0.1488	NA	NA	NA	1.171e-07	0.12748	0.1628	1.832e-11
Aspartate	Asp	ENPEP	WES imputed	4:111482570_C/CT	rs768719919	frameshift_variant	0.05198	0.00076	-0.9078	0.0001543	0.00088	2.168	8.454e-05	0.00081	1.458	3.554e-05
Aspartate	Asp	ENPEP	WES combined	4:111398208_A/G	rs10004516	missense_variant	0.0002055	0.12052	0.1488	NA	NA	NA	1.171e-07	0.12748	0.1628	1.832e-11
Decanoylcarnitine	C10	ETFDH	WES	4:159618737_G/A	rs1235904433	stop_gained	6.256e-11	0.00106	2.485	NA	0.00074	NA	1.075e-12	0.00095	2.372	2.534e-16
Decanoylcarnitine	C10	FNIP2	WES imputed	4:159747005_C/A	rs751930474	intron_variant	0.0948	0.00137	-0.591	0.006838	0.00088	1.64	0.8757	0.00113	0.05152	0.8399
Decanoylcarnitine	C10	ETFDH	WES combined	4:159618737_G/A	rs1235904433	stop_gained	6.256e-11	0.00106	2.485	NA	0.00074	NA	1.075e-12	0.00095	2.372	2.534e-16
Hexanoylcarnitine (Fumarylcarnitine)	C6 (C4:1-DC)	ETFDH	WES	4:159618737_G/A	rs1235904433	stop_gained	4.938e-12	0.00108	2.654	NA	0.00075	NA	2.081e-13	0.00096	2.438	7.987e-15
Hexanoylcarnitine (Fumarylcarnitine)	C6 (C4:1-DC)	PPID	WES imputed	4:159644494_G/C	rs2070630	5_prime_UTR_variant	0.0007229	0.29225	-0.0982	4.794e-09	0.29117	-0.1985	7.597e-11	0.29173	-0.1449	3.794e-13
Hexanoylcarnitine (Fumarylcarnitine)	C6 (C4:1-DC)	ETFDH	WES combined	4:159618737_G/A	rs1235904433	stop_gained	4.938e-12	0.00108	2.654	NA	0.00075	NA	2.081e-13	0.00096	2.438	7.987e-15
Octanoylcarnitine	C8	ETFDH	WES	4:159618737_G/A	rs1235904433	stop_gained	2.515e-12	0.00106	2.64	NA	0.00074	NA	3.402e-14	0.00095	2.509	6.498e-18
Octanoylcarnitine	C8	TMEM144	WES imputed	4:159133751_T/C	rs551661367	intron_variant	0.863	0.00122	-0.0618	0.01964	0.00229	-0.8501	0.06889	0.00166	-0.4632	0.01681
Octanoylcarnitine	C8	ETFDH	WES combined	4:159618737_G/A	rs1235904433	stop_gained	2.515e-12	0.00106	2.64	NA	0.00074	NA	3.402e-14	0.00095	2.509	6.498e-18
Decenoylcarnitine	C10:1	PPID	WES	4:159631991_G/T	rs9410	missense_variant	2.417e-06	0.27998	-0.1341	NA	NA	NA	3.775e-11	0.29633	-0.1443	2.723e-11
Decenoylcarnitine	C10:1	PPID	WES imputed	4:159644501_C/T	rs2070629	5_prime_UTR_variant	8.765e-06	0.29178	-0.1272	1.539e-06	0.29093	-0.1614	1.193e-10	0.29148	-0.1421	6.642e-11
Decenoylcarnitine	C10:1	ETFDH	WES combined	4:159620035_A/C	rs7679753	intron_variant	NA	NA	NA	NA	NA	NA	1.406e-09	0.36399	-0.1255	9.187e-10
Dodecanoylcarnitine	C12	PPID	WES	4:159631991_G/T	rs9410	missense_variant	1.192e-07	0.28114	-0.1467	NA	NA	NA	4.773e-14	0.29767	-0.1651	5.168e-14
Dodecanoylcarnitine	C12	PPID	WES imputed	4:159644494_G/C	rs2070630	5_prime_UTR_variant	3.472e-07	0.29396	-0.1426	1.116e-07	0.29185	-0.1799	4.748e-13	0.29303	-0.1602	5.331e-13
Dodecanoylcarnitine	C12	ETFDH	WES combined	4:159620035_A/C	rs7679753	intron_variant	NA	NA	NA	NA	NA	NA	4.762e-13	0.36538	-0.1507	4.648e-13
Hexanoylcarnitine (Fumarylcarnitine)	C6 (C4:1-DC)	ETFDH	WES	4:159618737_G/A	rs1235904433	stop_gained	4.938e-12	0.00108	2.654	NA	0.00075	NA	2.081e-13	0.00096	2.438	7.987e-15
Hexanoylcarnitine (Fumarylcarnitine)	C6 (C4:1-DC)	PPID	WES imputed	4:159644494_G/C	rs2070630	5_prime_UTR_variant	0.0007229	0.29225	-0.0982	4.794e-09	0.29117	-0.1985	7.597e-11	0.29173	-0.1449	3.794e-13
Hexanoylcarnitine (Fumarylcarnitine)	C6 (C4:1-DC)	ETFDH	WES combined	4:159620035_A/C	rs7679753	intron_variant	NA	NA	NA	NA	NA	NA	4.613e-11	0.36399	-0.1375	1.482e-13
Decenoylcarnitine	C10:1	PPID	WES	4:159631991_G/T	rs9410	missense_variant	2.417e-06	0.27998	-0.1341	NA	NA	NA	3.775e-11	0.29633	-0.1443	2.723e-11
Decenoylcarnitine	C10:1	PPID	WES imputed	4:159644501_C/T	rs2070629	5_prime_UTR_variant	8.765e-06	0.29178	-0.1272	1.539e-06	0.29093	-0.1614	1.193e-10	0.29148	-0.1421	6.642e-11
Decenoylcarnitine	C10:1	ETFDH	WES combined	4:159629814_A/C	rs17843966	3_prime_UTR_variant	NA	NA	NA	NA	NA	NA	3.705e-10	0.25378	-0.1429	9.407e-11
Dodecanoylcarnitine	C12	PPID	WES	4:159631991_G/T	rs9410	missense_variant	1.192e-07	0.28114	-0.1467	NA	NA	NA	4.773e-14	0.29767	-0.1651	5.168e-14
Dodecanoylcarnitine	C12	PPID	WES imputed	4:159644494_G/C	rs2070630	5_prime_UTR_variant	3.472e-07	0.29396	-0.1426	1.116e-07	0.29185	-0.1799	4.748e-13	0.29303	-0.1602	5.331e-13
Dodecanoylcarnitine	C12	ETFDH	WES combined	4:159629814_A/C	rs17843966	3_prime_UTR_variant	NA	NA	NA	NA	NA	NA	2.746e-15	0.25454	-0.1806	3.013e-15
Hexanoylcarnitine (Fumarylcarnitine)	C6 (C4:1-DC)	ETFDH	WES	4:159618737_G/A	rs1235904433	stop_gained	4.938e-12	0.00108	2.654	NA	0.00075	NA	2.081e-13	0.00096	2.438	7.987e-15
Hexanoylcarnitine (Fumarylcarnitine)	C6 (C4:1-DC)	PPID	WES imputed	4:159644494_G/C	rs2070630	5_prime_UTR_variant	0.0007229	0.29225	-0.0982	4.794e-09	0.29117	-0.1985	7.597e-11	0.29173	-0.1449	3.794e-13
Hexanoylcarnitine (Fumarylcarnitine)	C6 (C4:1-DC)	ETFDH	WES combined	4:159629814_A/C	rs17843966	3_prime_UTR_variant	NA	NA	NA	NA	NA	NA	1.635e-09	0.25378	-0.1386	9.122e-13
Decenoylcarnitine	C10:1	PPID	WES	4:159631991_G/T	rs9410	missense_variant	2.417e-06	0.27998	-0.1341	NA	NA	NA	3.775e-11	0.29633	-0.1443	2.723e-11
Decenoylcarnitine	C10:1	PPID	WES imputed	4:159644501_C/T	rs2070629	5_prime_UTR_variant	8.765e-06	0.29178	-0.1272	1.539e-06	0.29093	-0.1614	1.193e-10	0.29148	-0.1421	6.642e-11
Decenoylcarnitine	C10:1	PPID	WES combined	4:159631991_G/T	rs9410	missense_variant	2.417e-06	0.27998	-0.1341	NA	NA	NA	3.775e-11	0.29633	-0.1443	2.723e-11
Dodecanoylcarnitine	C12	PPID	WES	4:159631991_G/T	rs9410	missense_variant	1.192e-07	0.28114	-0.1467	NA	NA	NA	4.773e-14	0.29767	-0.1651	5.168e-14
Dodecanoylcarnitine	C12	PPID	WES imputed	4:159644494_G/C	rs2070630	5_prime_UTR_variant	3.472e-07	0.29396	-0.1426	1.116e-07	0.29185	-0.1799	4.748e-13	0.29303	-0.1602	5.331e-13
Dodecanoylcarnitine	C12	PPID	WES combined	4:159631991_G/T	rs9410	missense_variant	1.192e-07	0.28114	-0.1467	NA	NA	NA	4.773e-14	0.29767	-0.1651	5.168e-14
Hexanoylcarnitine (Fumarylcarnitine)	C6 (C4:1-DC)	ETFDH	WES	4:159618737_G/A	rs1235904433	stop_gained	4.938e-12	0.00108	2.654	NA	0.00075	NA	2.081e-13	0.00096	2.438	7.987e-15
Hexanoylcarnitine (Fumarylcarnitine)	C6 (C4:1-DC)	PPID	WES imputed	4:159644494_G/C	rs2070630	5_prime_UTR_variant	0.0007229	0.29225	-0.0982	4.794e-09	0.29117	-0.1985	7.597e-11	0.29173	-0.1449	3.794e-13
Hexanoylcarnitine (Fumarylcarnitine)	C6 (C4:1-DC)	PPID	WES combined	4:159631991_G/T	rs9410	missense_variant	0.0001068	0.27998	-0.1113	NA	NA	NA	1.275e-11	0.29633	-0.149	1.154e-13
Symmetric dimethylarginine	SDMA	AGXT2	WES	5:35039486_C/T	rs37370	missense_variant	1.056e-13	0.07862	-0.3602	NA	NA	NA	3.104e-21	0.08272	-0.345	0.4
Symmetric dimethylarginine	SDMA	AGXT2	WES imputed	5:35039437_A/G	rs2279651	synonymous_variant	3.89e-05	0.34383	-0.1137	1.027e-07	0.36014	-0.1679	5.456e-10	0.3501	-0.1319	0.3
Symmetric dimethylarginine	SDMA	AGXT2	WES combined	5:35039486_C/T	rs37370	missense_variant	1.056e-13	0.07862	-0.3602	NA	NA	NA	3.104e-21	0.08272	-0.345	0.4
Hydroxyvalerylcarnitine (Methylmalonylcarnitine)	C5-OH (C3-DC-M)	MCCC2	WES	5:70952685_T/C	rs751970792	stop_lost	9.109e-12	0.0017	2.122	NA	0.00065	NA	1.852e-12	0.00129	2.01	1.852e-12
Hydroxyvalerylcarnitine (Methylmalonylcarnitine)	C5-OH (C3-DC-M)	MAP1B	WES imputed	5:71403096_T/TTCC	.	5_prime_UTR_variant	0.3428	0.00093	-0.389	0.0009692	0.00084	2.124	0.1007	0.00087	0.5876	0.1007
Hydroxyvalerylcarnitine (Methylmalonylcarnitine)	C5-OH (C3-DC-M)	MCCC2	WES combined	5:70952685_T/C	rs751970792	stop_lost	9.109e-12	0.0017	2.122	NA	0.00065	NA	1.852e-12	0.00129	2.01	1.852e-12
Hexadecenoylcarnitine	C16:1	PDLIM4	WES	5:131607402_T/C	rs10479000	intron_variant	1.555e-06	0.48883	-0.1215	4.89e-05	0.48648	-0.1244	2.303e-10	0.48942	-0.1266	1.304e-10
Hexadecenoylcarnitine	C16:1	SLC22A5	WES imputed	5:131705458_C/G	rs2631367	5_prime_UTR_variant	5.032e-06	0.46589	0.1145	1.16e-05	0.47393	0.1345	6.749e-10	0.47024	0.1229	2.355e-10
Hexadecenoylcarnitine	C16:1	PDLIM4	WES combined	5:131607402_T/C	rs10479000	intron_variant	1.555e-06	0.48883	-0.1215	4.89e-05	0.48648	-0.1244	2.303e-10	0.48942	-0.1266	1.304e-10
Butyrylcarnitine	C4	SLC22A5	WES	5:131714129_G/A	rs386134194	synonymous_variant	3.693e-10	0.00278	-1.548	0.0005056	0.00401	-1.002	1.434e-10	0.00328	-1.216	1.348e-12
Butyrylcarnitine	C4	SLC22A4	WES imputed	5:131671769_T/C	rs272878	intron_variant	0.0002962	0.31648	-0.09939	5.083e-08	0.30311	-0.1843	1.732e-09	0.30994	-0.1321	8.873e-10
Butyrylcarnitine	C4	SLC22A4	WES combined	5:131667736_A/G	rs272885	intron_variant	NA	NA	NA	NA	NA	NA	4.777e-10	0.30188	-0.1388	3.066e-10
Carnitine	C0	SLC22A5	WES	5:131714129_G/A	rs386134194	synonymous_variant	1.383e-09	0.00273	-1.515	5.74e-05	0.00397	-1.143	5.637e-12	0.00323	-1.305	6.493e-12
Carnitine	C0	SLC22A5	WES imputed	5:131705698_G/A	rs139203363	missense_variant	0.0298	0.00121	-0.8279	3.827e-08	0.00323	-1.546	4.771e-08	0.00204	-1.275	1.889e-07
Carnitine	C0	SLC22A5	WES combined	5:131714129_G/A	rs386134194	synonymous_variant	1.383e-09	0.00273	-1.515	5.74e-05	0.00397	-1.143	5.637e-12	0.00323	-1.305	6.493e-12
Acetylcarnitine	C2	SLC22A5	WES	5:131714129_G/A	rs386134194	synonymous_variant	1.064e-11	0.00273	-1.68	0.0001295	0.00397	-1.089	2.375e-13	0.00323	-1.382	3.195e-13
Acetylcarnitine	C2	ACSL6	WES imputed	5:131305790_G/A	rs115517788	intron_variant	0.1129	0.0088	0.22	5.04e-05	0.00882	0.7197	0.0005864	0.00886	0.3811	0.008256
Acetylcarnitine	C2	SLC22A5	WES combined	5:131714129_G/A	rs386134194	synonymous_variant	1.064e-11	0.00273	-1.68	0.0001295	0.00397	-1.089	2.375e-13	0.00323	-1.382	3.195e-13
Butyrylcarnitine	C4	SLC22A5	WES	5:131714129_G/A	rs386134194	synonymous_variant	3.693e-10	0.00278	-1.548	0.0005056	0.00401	-1.002	1.434e-10	0.00328	-1.216	1.348e-12
Butyrylcarnitine	C4	SLC22A4	WES imputed	5:131671769_T/C	rs272878	intron_variant	0.0002962	0.31648	-0.09939	5.083e-08	0.30311	-0.1843	1.732e-09	0.30994	-0.1321	8.873e-10
Butyrylcarnitine	C4	SLC22A5	WES combined	5:131714129_G/A	rs386134194	synonymous_variant	3.693e-10	0.00278	-1.548	0.0005056	0.00401	-1.002	1.434e-10	0.00328	-1.216	1.348e-12
Hexadecenoylcarnitine	C16:1	PDLIM4	WES	5:131607402_T/C	rs10479000	intron_variant	1.555e-06	0.48883	-0.1215	4.89e-05	0.48648	-0.1244	2.303e-10	0.48942	-0.1266	1.304e-10
Hexadecenoylcarnitine	C16:1	SLC22A5	WES imputed	5:131705458_C/G	rs2631367	5_prime_UTR_variant	5.032e-06	0.46589	0.1145	1.16e-05	0.47393	0.1345	6.749e-10	0.47024	0.1229	2.355e-10
Hexadecenoylcarnitine	C16:1	SLC22A5	WES combined	5:131723288_T/C	rs2073643	intron_variant	NA	NA	NA	NA	NA	NA	5.255e-10	0.42728	-0.1257	2.966e-10
Carnitine	C0	SLC36A2	WES	5:150723155_C/A	rs77010315	missense_variant	8.353e-14	0.02565	-0.6165	4.059e-06	0.02691	-0.4612	4.878e-17	0.02602	-0.543	1.693e-18
Carnitine	C0	SLC36A2	WES imputed	5:150723155_C/A	rs77010315	missense_variant	8.353e-14	0.02565	-0.6165	4.059e-06	0.02691	-0.4612	4.878e-17	0.02602	-0.543	1.693e-18
Carnitine	C0	SLC36A2	WES combined	5:150723155_C/A	rs77010315	missense_variant	8.353e-14	0.02565	-0.6165	4.059e-06	0.02691	-0.4612	4.878e-17	0.02602	-0.543	1.693e-18
Taurine	Taurine	F12	WES	5:176836532_A/G	rs1801020	5_prime_UTR_variant	1.517e-10	0.23201	0.2005	NA	NA	NA	5.893e-16	0.23509	0.1898	5.893e-16
Taurine	Taurine	DBN1	WES imputed	5:176884641_C/T	rs79853090	3_prime_UTR_variant	0.9866	0.00987	0.002157	4.578e-06	0.01051	-0.7536	0.006365	0.01015	-0.2761	0.006365
Taurine	Taurine	F12	WES combined	5:176836532_A/G	rs1801020	5_prime_UTR_variant	1.517e-10	0.23201	0.2005	NA	NA	NA	5.893e-16	0.23509	0.1898	5.893e-16
Aspartate	Asp	F12	WES	5:176836532_A/G	rs1801020	5_prime_UTR_variant	3.504e-05	0.23209	0.1281	NA	NA	NA	2.506e-09	0.23518	0.1424	3.472e-10
Aspartate	Asp	F12	WES imputed	5:176831177_TC/T	rs35966430	intron_variant	0.0004596	0.32582	0.09722	0.0003293	0.32916	0.1181	1.733e-06	0.32734	0.1042	5.02e-07
Aspartate	Asp	F12	WES combined	5:176836532_A/G	rs1801020	5_prime_UTR_variant	3.504e-05	0.23209	0.1281	NA	NA	NA	2.506e-09	0.23518	0.1424	3.472e-10
Sarcosine	Sarcosine	PEX6	WES	6:42946943_G/A	rs9462859	5_prime_UTR_variant	8.919e-13	0.47904	-0.2016	0.004795	0.47463	-0.09301	7.83e-13	0.47786	-0.1559	7.83e-13
Sarcosine	Sarcosine	PEX6	WES imputed	6:42947013_G/C	rs9462860	upstream_gene_variant	5.551e-09	0.45178	-0.1572	0.0002368	0.4665	-0.1233	3.586e-12	0.45529	-0.1494	3.586e-12
Sarcosine	Sarcosine	PEX6	WES combined	6:42946943_G/A	rs9462859	5_prime_UTR_variant	8.919e-13	0.47904	-0.2016	0.004795	0.47463	-0.09301	7.83e-13	0.47786	-0.1559	7.83e-13
Propionylcarnitine	C3	SLC22A1	WES	6:160551204_G/C	rs683369	missense_variant	6.938e-08	0.19338	0.1769	NA	NA	NA	7.73e-12	0.19553	0.1742	1.164e-19
Propionylcarnitine	C3	SLC22A1	WES imputed	6:160543148_C/T	rs12208357	missense_variant	1.368e-08	0.06527	-0.2942	3.043e-07	0.06177	-0.3321	4.423e-14	0.06396	-0.31	1.014e-17
Propionylcarnitine	C3	SLC22A1	WES combined	6:160551204_G/C	rs683369	missense_variant	6.938e-08	0.19338	0.1769	NA	NA	NA	7.73e-12	0.19553	0.1742	1.164e-19
Butyrylcarnitine	C4	SLC22A1	WES	6:160560824_G/A	rs34130495	missense_variant	9.827e-08	0.02733	-0.436	0.001508	0.03543	-0.2722	1.245e-10	0.03043	-0.3875	0.6
Butyrylcarnitine	C4	SLC22A1	WES imputed	6:160543080_G/A	rs35888596	missense_variant	0.1976	0.0122	-0.1534	0.007384	0.00744	-0.5139	0.02178	0.01028	-0.2368	1.211e-07
Butyrylcarnitine	C4	SLC22A1	WES combined	6:160560824_G/A	rs34130495	missense_variant	9.827e-08	0.02733	-0.436	0.001508	0.03543	-0.2722	1.245e-10	0.03043	-0.3875	0.1
Propionylcarnitine	C3	SLC22A1	WES	6:160551204_G/C	rs683369	missense_variant	6.938e-08	0.19338	0.1769	NA	NA	NA	7.73e-12	0.19553	0.1742	0.6
Propionylcarnitine	C3	SLC22A1	WES imputed	6:160543148_C/T	rs12208357	missense_variant	1.368e-08	0.06527	-0.2942	3.043e-07	0.06177	-0.3321	4.423e-14	0.06396	-0.31	1.014e-17
Propionylcarnitine	C3	SLC22A1	WES combined	6:160560845_A/G	rs628031	missense_variant	0.005703	0.36992	0.07386	NA	NA	NA	0.0003074	0.37682	0.07446	3.101e-12
Serotonin	Serotonin	NA	WES	6:160560880_CATG/C	NA	NA	7.139e-09	0.1565	0.2092	NA	NA	NA	NA	NA	NA	NA
Serotonin	Serotonin	IGF2R	WES imputed	6:160390603_G/C	rs8191693	intron_variant	0.002356	0.06457	0.1552	2.923e-05	0.0666	0.2738	4.514e-06	0.06553	0.1942	4.476e-06
Serotonin	Serotonin	SLC22A1	WES combined	6:160560880_C/CATG	.	inframe_insertion	7.139e-09	0.1565	0.2092	0.0001233	0.16384	-0.1598	1.252e-11	0.15938	-0.1902	1.231e-11
Lysine	Lys	AASS	WES	7:121758634_G/A	rs138307481	missense_variant&NMD_transcript_variant	0.002146	0.00091	-1.273	3.563e-10	0.00193	-2.276	2.109e-11	0.00132	-1.856	2.356e-11
Lysine	Lys	AASS	WES imputed	7:121758634_G/A	rs138307481	missense_variant&NMD_transcript_variant	0.002146	0.00091	-1.273	3.563e-10	0.00193	-2.276	2.109e-11	0.00132	-1.856	2.356e-11
Lysine	Lys	AASS	WES combined	7:121758634_G/A	rs138307481	missense_variant&NMD_transcript_variant	0.002146	0.00091	-1.273	3.563e-10	0.00193	-2.276	2.109e-11	0.00132	-1.856	2.356e-11
Putrescine	Putrescine	AOC1	WES	7:150553605_C/T	rs10156191	missense_variant	0.02466	0.2374	0.0696	NA	NA	NA	0.2273	0.23634	0.02892	2.465e-15
Putrescine	Putrescine	TMEM176A	WES imputed	7:150502016_C/G	rs1044608	3_prime_UTR_variant	6.224e-10	0.06891	-0.3227	7.806e-08	0.07521	-0.3204	4.433e-14	0.07191	-0.3033	2.744e-11
Putrescine	Putrescine	AOC1	WES combined	7:150553605_C/T	rs10156191	missense_variant	0.02466	0.2374	0.0696	NA	NA	NA	0.2273	0.23634	0.02892	2.465e-15
Decanoylcarnitine	C10	COL27A1	WES	9:116931401_C/T	rs145560419	synonymous_variant	4.032e-07	0.00076	-2.642	NA	0.00024	NA	8.821e-09	0.00055	-2.681	3.155e-10
Decanoylcarnitine	C10	COL27A1	WES imputed	9:116967589_C/T	rs150094999	intron_variant	0.9731	0.00079	0.01539	0.000268	0.00105	1.845	0.00978	0.00106	0.8247	0.00835
Decanoylcarnitine	C10	COL27A1	WES combined	9:116931401_C/T	rs145560419	synonymous_variant	4.032e-07	0.00076	-2.642	NA	0.00024	NA	8.821e-09	0.00055	-2.681	3.155e-10
Octanoylcarnitine	C8	COL27A1	WES	9:116931401_C/T	rs145560419	synonymous_variant	4.649e-07	0.00076	-2.608	NA	0.00024	NA	4.696e-09	0.00055	-2.673	4.255e-10
Octanoylcarnitine	C8	COL27A1	WES imputed	9:116967589_C/T	rs150094999	intron_variant	0.5908	0.00079	-0.2438	0.0004113	0.00105	1.779	0.04822	0.00106	0.6241	0.03204
Octanoylcarnitine	C8	COL27A1	WES combined	9:116931401_C/T	rs145560419	synonymous_variant	4.649e-07	0.00076	-2.608	NA	0.00024	NA	4.696e-09	0.00055	-2.673	4.255e-10
Sarcosine	Sarcosine	SARDH	WES	9:136598926_C/G	rs10993780	intron_variant	3.318e-20	0.17066	-0.3413	7.6e-28	0.17124	-0.4649	5.322e-44	0.17083	-0.3948	5.322e-44
Sarcosine	Sarcosine	SARDH	WES imputed	9:136598926_C/G	rs10993780	intron_variant	3.318e-20	0.17066	-0.3413	7.6e-28	0.17124	-0.4649	5.322e-44	0.17083	-0.3948	5.322e-44
Sarcosine	Sarcosine	SARDH	WES combined	9:136598926_C/G	rs10993780	intron_variant	3.318e-20	0.17066	-0.3413	7.6e-28	0.17124	-0.4649	5.322e-44	0.17083	-0.3948	5.322e-44
Phosphatidylcholine diacyl C36:0	PC aa C36:0	NA	WES	10:52603951_AT/A	NA	NA	1.104e-10	0.00076	2.98	NA	NA	NA	NA	NA	NA	NA
Phosphatidylcholine diacyl C36:0	PC aa C36:0	A1CF	WES imputed	10:52573772_C/T	rs41274050	missense_variant	0.678	0.00455	0.08067	0.003314	0.00477	0.8098	0.08654	0.00448	0.2836	0.07456
Phosphatidylcholine diacyl C36:0	PC aa C36:0	A1CF	WES combined	10:52603951_A/AT	.	intron_variant	1.104e-10	0.00076	2.98	0.4392	0.00087	-0.5307	4.096e-09	0.00081	-2.235	5.371e-09
Putrescine	Putrescine	JMJD1C	WES	10:64963449_T/C	rs4379723	intron_variant	4.324e-10	0.49087	0.1614	7.661e-13	0.49718	0.2226	5.95e-19	0.4917	0.1837	1.691e-19
Putrescine	Putrescine	JMJD1C-AS1	WES imputed	10:65225899_A/AGGCGGC	rs3841602	non_coding_transcript_exon_variant	1.645e-09	0.47847	0.1602	3.385e-13	0.48156	0.235	1.662e-19	0.47744	0.1912	5.165e-20
Putrescine	Putrescine	JMJD1C-AS1	WES combined	10:65225899_A/AGGCGGC	rs3841602	non_coding_transcript_exon_variant	1.645e-09	0.47847	0.1602	3.385e-13	0.48156	0.235	1.662e-19	0.47744	0.1912	5.165e-20
Hydroxyhexadecanoylcarnitine	C16-OH	PYROXD2	WES	10:100148308_T/G	rs2147895	intron_variant	3.52e-14	0.33015	-0.1981	9.613e-07	0.34418	-0.156	8.92e-19	0.33605	-0.1812	8.92e-19
Hydroxyhexadecanoylcarnitine	C16-OH	PYROXD2	WES imputed	10:100152055_C/G	rs6584191	intron_variant	9.833e-14	0.33475	-0.1934	1.714e-07	0.35411	-0.1659	9.029e-19	0.34343	-0.1807	9.029e-19
Hydroxyhexadecanoylcarnitine	C16-OH	PYROXD2	WES combined	10:100148308_T/G	rs2147895	intron_variant	3.52e-14	0.33015	-0.1981	9.613e-07	0.34418	-0.156	8.92e-19	0.33605	-0.1812	8.92e-19
Histidine	His	PSMC3	WES	11:47445720_G/A	rs186188306	synonymous_variant	1.053e-07	0.00121	-2.15	NA	0.0003	NA	5.534e-10	0.00085	-2.338	4.54e-09
Histidine	His	RAPSN	WES imputed	11:47464111_T/C	rs966861680	intron_variant	0.01597	0.00364	0.5367	0.002033	0.00153	1.188	0.0006542	0.0028	0.6687	0.001278
Histidine	His	PSMC3	WES combined	11:47445720_G/A	rs186188306	synonymous_variant	1.053e-07	0.00121	-2.15	NA	0.0003	NA	5.534e-10	0.00085	-2.338	4.54e-09
Phosphatidylcholine acyl-alkyl C38:3	PC ae C38:3	MYRF	WES	11:61547068_G/A	rs7943728	intron_variant	1.607e-09	0.14451	0.2232	4.124e-12	0.18692	0.2645	1.942e-19	0.16161	0.2454	0.5
Phosphatidylcholine acyl-alkyl C38:3	PC ae C38:3	MYRF	WES imputed	11:61543499_T/C	rs174528	intron_variant	9.949e-07	0.32832	0.1369	3.075e-12	0.35929	0.219	8.681e-16	0.34043	0.1724	0.2
Phosphatidylcholine acyl-alkyl C38:3	PC ae C38:3	MYRF	WES combined	11:61547068_G/A	rs7943728	intron_variant	1.607e-09	0.14451	0.2232	4.124e-12	0.18692	0.2645	1.942e-19	0.16161	0.2454	0.5
lysoPhosphatidylcholine acyl C26:1	lysoPC a C26:1	MYRF	WES	11:61551356_T/C	rs174535	synonymous_variant	4.338e-09	0.28613	-0.1657	2.764e-06	0.32746	-0.152	1.114e-12	0.30269	-0.1521	1.114e-12
lysoPhosphatidylcholine acyl C26:1	lysoPC a C26:1	MYRF	WES imputed	11:61551927_A/C	rs174536	intron_variant	8.922e-09	0.27692	-0.1597	2.345e-06	0.31981	-0.1569	1.31e-11	0.29425	-0.1458	1.31e-11
lysoPhosphatidylcholine acyl C26:1	lysoPC a C26:1	TMEM258	WES combined	11:61560081_G/A	rs174538	5_prime_UTR_variant&NMD_transcript_variant	2.98e-07	0.2497	-0.1493	NA	NA	NA	3.285e-10	0.26426	-0.1392	3.285e-10
Phosphatidylcholine acyl-alkyl C38:3	PC ae C38:3	MYRF	WES	11:61547068_G/A	rs7943728	intron_variant	1.607e-09	0.14451	0.2232	4.124e-12	0.18692	0.2645	1.942e-19	0.16161	0.2454	1.942e-19
Phosphatidylcholine acyl-alkyl C38:3	PC ae C38:3	MYRF	WES imputed	11:61543499_T/C	rs174528	intron_variant	9.949e-07	0.32832	0.1369	3.075e-12	0.35929	0.219	8.681e-16	0.34043	0.1724	8.681e-16
Phosphatidylcholine acyl-alkyl C38:3	PC ae C38:3	TMEM258	WES combined	11:61560081_G/A	rs174538	5_prime_UTR_variant&NMD_transcript_variant	2.496e-08	0.2497	0.168	NA	NA	NA	1.554e-17	0.26426	0.1942	1.554e-17
lysoPhosphatidylcholine acyl C26:1	lysoPC a C26:1	MYRF	WES	11:61551356_T/C	rs174535	synonymous_variant	4.338e-09	0.28613	-0.1657	2.764e-06	0.32746	-0.152	1.114e-12	0.30269	-0.1521	1.114e-12
lysoPhosphatidylcholine acyl C26:1	lysoPC a C26:1	MYRF	WES imputed	11:61551927_A/C	rs174536	intron_variant	8.922e-09	0.27692	-0.1597	2.345e-06	0.31981	-0.1569	1.31e-11	0.29425	-0.1458	1.31e-11
lysoPhosphatidylcholine acyl C26:1	lysoPC a C26:1	FADS2	WES combined	11:61604814_C/A	rs174577	intron_variant	NA	NA	NA	NA	NA	NA	2.848e-14	0.31465	-0.1607	2.848e-14
Asparagine	Asn	ASRGL1	WES	11:62105391_C/T	rs2513749	5_prime_UTR_variant	8.069e-09	0.11764	0.2365	NA	NA	NA	1.207e-15	0.12036	0.2433	7.791e-19
Asparagine	Asn	ASRGL1	WES imputed	11:62156572_G/A	rs74692811	intron_variant	1.094e-08	0.11233	-0.2377	1.511e-08	0.1191	-0.2593	6.747e-15	0.11515	-0.2422	7.547e-18
Asparagine	Asn	ASRGL1	WES combined	11:62105391_C/T	rs2513749	5_prime_UTR_variant	8.069e-09	0.11764	0.2365	NA	NA	NA	1.207e-15	0.12036	0.2433	7.791e-19
Glutamine	Gln	GLS2	WES	12:56866487_A/G	.	missense_variant	1.563e-09	0.00076	-2.817	NA	0.00039	NA	8.152e-13	0.00061	-2.968	3.144e-14
Glutamine	Gln	HSD17B6	WES imputed	12:57146170_T/C	rs904753198	intron_variant	0.4029	0.00411	-0.1709	0.03855	0.00624	0.4066	0.4834	0.00506	0.1005	0.05893
Glutamine	Gln	GLS2	WES combined	12:56866487_A/G	.	missense_variant	1.563e-09	0.00076	-2.817	NA	0.00039	NA	8.152e-13	0.00061	-2.968	3.144e-14
Histidine	His	NA	WES	12:96389657_T/TC	NA	NA	2.232e-15	0.00516	1.477	NA	NA	NA	NA	NA	NA	NA
Histidine	His	HAL	WES imputed	12:96379884_C/T	rs117991621	missense_variant	8.157e-12	0.01078	0.8792	3.023e-07	0.00842	0.8969	3.218e-18	0.01005	0.9032	0.5
Histidine	His	HAL	WES combined	12:96379884_C/T	rs117991621	missense_variant	8.157e-12	0.01078	0.8792	3.023e-07	0.00842	0.8969	3.218e-18	0.01005	0.9032	0.5
Histidine	His	TMPO	WES	12:98929093_A/G	rs867372792	3_prime_UTR_variant,3_prime_UTR_variant	5.614e-12	0.00243	1.855	0.0007208	0.00164	1.347	8.215e-15	0.00212	1.716	5.566e-13
Histidine	His	NA	WES imputed	12:99042393_A/AT	NA	NA	0.0331	0.00137	0.7184	0.0001	0.0011	-2.363	0.0004234	0.00117	-1.135	0.0003292
Histidine	His	TMPO	WES combined	12:98929093_A/G	rs867372792	3_prime_UTR_variant,3_prime_UTR_variant	5.614e-12	0.00243	1.855	0.0007208	0.00164	1.347	8.215e-15	0.00212	1.716	5.566e-13
Histidine	His	UHRF1BP1L	WES	12:100492127_T/C	NA	splice_region_variant,intron_variant,splice_region_variant,intron_variant	5.735e-12	0.00243	1.854	0.1338	0.00249	0.4825	1.278e-10	0.00245	1.325	2.64e-09
Histidine	His	ANKS1B	WES imputed	12:100378010_C/T	rs199962831	synonymous_variant	0.8428	0.00744	-0.03142	0.08182	0.00349	-0.5212	0.3256	0.00594	-0.1375	0.4718
Histidine	His	UHRF1BP1L	WES combined	12:100492127_T/C	NA	splice_region_variant,intron_variant,splice_region_variant,intron_variant	5.735e-12	0.00243	1.854	0.1338	0.00249	0.4825	1.278e-10	0.00245	1.325	2.64e-09
Phenylalanine	Phe	PARPBP	WES	12:102591269_G/T	rs200627654	3_prime_UTR_variant	1.254e-08	0.00364	1.256	3.561e-11	0.00546	1.455	8.24e-17	0.00432	1.301	1.436e-14
Phenylalanine	Phe	PARPBP	WES imputed	12:102591269_G/T	rs200627654	3_prime_UTR_variant	1.254e-08	0.00364	1.256	3.561e-11	0.00546	1.455	8.24e-17	0.00432	1.301	1.436e-14
Phenylalanine	Phe	PARPBP	WES combined	12:102591269_G/T	rs200627654	3_prime_UTR_variant	1.254e-08	0.00364	1.256	3.561e-11	0.00546	1.455	8.24e-17	0.00432	1.301	1.436e-14
Phenylalanine	Phe	PAH	WES	12:103234177_C/T	rs5030861	splice_donor_variant	4.343e-18	0.00334	1.999	4.982e-14	0.00589	1.529	2.581e-28	0.00428	1.715	1.24e-25
Phenylalanine	Phe	PAH	WES imputed	12:103234177_C/T	rs5030861	splice_donor_variant	4.343e-18	0.00334	1.999	4.982e-14	0.00589	1.529	2.581e-28	0.00428	1.715	1.24e-25
Phenylalanine	Phe	PAH	WES combined	12:103234177_C/T	rs5030861	splice_donor_variant	4.343e-18	0.00334	1.999	4.982e-14	0.00589	1.529	2.581e-28	0.00428	1.715	1.24e-25
Phenylalanine	Phe	KIAA1033	WES	12:105514304_T/C	rs749103109	intron_variant&non_coding_transcript_variant	1.16e-07	0.00137	1.844	0.0002362	0.0032	1.035	9.036e-10	0.0021	1.35	2.947e-09
Phenylalanine	Phe	KIAA1033	WES imputed	12:105514304_T/C	rs749103109	intron_variant&non_coding_transcript_variant	1.16e-07	0.00137	1.844	0.0002362	0.0032	1.035	9.036e-10	0.0021	1.35	2.947e-09
Phenylalanine	Phe	KIAA1033	WES combined	12:105514304_T/C	rs749103109	intron_variant&non_coding_transcript_variant	1.16e-07	0.00137	1.844	0.0002362	0.0032	1.035	9.036e-10	0.0021	1.35	2.947e-09
Histidine	His	NA	WES	12:110385016_AG/A	NA	NA	2.574e-10	0.00091	-2.965	NA	NA	NA	NA	NA	NA	NA
Histidine	His	C12orf76	WES imputed	12:110505401_G/A	rs191051499	5_prime_UTR_variant	0.6359	0.00152	0.1651	0.0005928	0.00093	-2.002	0.2462	0.00126	-0.3572	0.2259
Histidine	His	GIT2	WES combined	12:110385016_A/AG	.	intron_variant	2.574e-10	0.00091	-2.965	NA	0.00062	NA	4.232e-12	0.0008	2.758	1.19e-11
Butyrylcarnitine	C4	ACADS	WES	12:121175678_C/T	rs1800556	missense_variant	6.336e-05	0.05513	0.2305	NA	NA	NA	2.894e-07	0.05309	0.2337	0.6
Butyrylcarnitine	C4	SPPL3	WES imputed	12:121341904_C/T	.	5_prime_UTR_variant	0.04141	0.00201	-0.6019	0.0009827	0.00416	-0.8193	0.0001131	0.00288	-0.7502	0.2
Butyrylcarnitine	C4	ACADS	WES combined	12:121175678_C/T	rs1800556	missense_variant	6.336e-05	0.05513	0.2305	NA	NA	NA	2.894e-07	0.05309	0.2337	0.5
Propionylcarnitine	C3	PCCA	WES	13:101020733_G/T	rs61749895	missense_variant	3.464e-08	0.01609	0.5551	1.1e-05	0.01867	0.5427	4.589e-12	0.01725	0.5473	0.7
Propionylcarnitine	C3	PCCA	WES imputed	13:101020733_G/T	rs61749895	missense_variant	3.464e-08	0.01609	0.5551	1.1e-05	0.01867	0.5427	4.589e-12	0.01725	0.5473	0.7
Propionylcarnitine	C3	PCCA	WES combined	13:101020733_G/T	rs61749895	missense_variant	3.464e-08	0.01609	0.5551	1.1e-05	0.01867	0.5427	4.589e-12	0.01725	0.5473	0.7
Asparagine	Asn	ASPG	WES	14:104576448_G/A	rs34362765	intron_variant	1.243e-64	0.3643	-0.4608	2.105e-42	0.35008	-0.445	8.831e-105	0.35834	-0.4565	5.799e-25
Asparagine	Asn	ASPG	WES imputed	14:104576448_G/A	rs34362765	intron_variant	1.243e-64	0.3643	-0.4608	2.105e-42	0.35008	-0.445	8.831e-105	0.35834	-0.4565	5.799e-25
Asparagine	Asn	ASPG	WES combined	14:104576448_G/A	rs34362765	intron_variant	1.243e-64	0.3643	-0.4608	2.105e-42	0.35008	-0.445	8.831e-105	0.35834	-0.4565	5.799e-25
Decenoylcarnitine	C10:1	ABCC1	WES	16:16108282_T/C	rs4148337	intron_variant	3.202e-07	0.35648	0.1371	0.02332	0.33903	0.07263	2.719e-08	0.34807	0.1161	1.07e-08
Decenoylcarnitine	C10:1	ABCC1	WES imputed	16:16139878_A/G	rs35588	splice_region_variant&intron_variant	7.676e-05	0.32165	-0.1113	0.0007054	0.31883	-0.1104	4.213e-07	0.32058	-0.1088	2.459e-07
Decenoylcarnitine	C10:1	ABCC1	WES combined	16:16108894_G/A	rs1967120	intron_variant	NA	NA	NA	NA	NA	NA	7.306e-09	0.34371	0.1221	2.347e-09
Decanoylcarnitine	C10	ABCC1	WES	16:16108282_T/C	rs4148337	intron_variant	5.411e-07	0.35695	0.134	0.008875	0.33921	0.08521	2.049e-08	0.34845	0.1195	2.725e-09
Decanoylcarnitine	C10	ABCC1	WES imputed	16:16180896_G/A	rs45573034	intron_variant	0.1804	0.02171	-0.123	0.01456	0.01746	-0.284	0.007794	0.02001	-0.1973	0.001086
Decanoylcarnitine	C10	ABCC1	WES combined	16:16108894_G/A	rs1967120	intron_variant	NA	NA	NA	NA	NA	NA	5.371e-09	0.34411	0.1257	6.501e-10
Dodecanoylcarnitine	C12	ABCC1	WES	16:16108282_T/C	rs4148337	intron_variant	7.731e-08	0.35695	0.1413	0.007868	0.33921	0.08588	6.409e-09	0.34845	0.1224	6.473e-09
Dodecanoylcarnitine	C12	ABCC6	WES imputed	16:16256935_G/A	rs72653706	stop_gained	0.9562	0.00182	-0.0164	0.0002617	0.00274	-1.164	0.01018	0.00212	-0.5809	0.0109
Dodecanoylcarnitine	C12	ABCC1	WES combined	16:16108894_G/A	rs1967120	intron_variant	NA	NA	NA	NA	NA	NA	3.008e-09	0.34411	0.1263	3.017e-09
Dodecenoylcarnitine	C12:1	ABCC1	WES	16:16138322_T/C	rs246221	synonymous_variant	5.447e-07	0.33122	-0.1413	NA	NA	NA	2.201e-09	0.32989	-0.1276	2.201e-09
Dodecenoylcarnitine	C12:1	ABCC1	WES imputed	16:16139878_A/G	rs35588	splice_region_variant&intron_variant	1.494e-06	0.32165	-0.1371	0.0003499	0.31883	-0.1128	3.229e-09	0.32058	-0.1275	3.229e-09
Dodecenoylcarnitine	C12:1	ABCC1	WES combined	16:16126475_G/A	rs924136	intron_variant	NA	NA	NA	NA	NA	NA	5.793e-10	0.46922	0.1244	5.793e-10
Decanoylcarnitine	C10	ABCC1	WES	16:16108282_T/C	rs4148337	intron_variant	5.411e-07	0.35695	0.134	0.008875	0.33921	0.08521	2.049e-08	0.34845	0.1195	2.725e-09
Decanoylcarnitine	C10	ABCC1	WES imputed	16:16180896_G/A	rs45573034	intron_variant	0.1804	0.02171	-0.123	0.01456	0.01746	-0.284	0.007794	0.02001	-0.1973	0.001086
Decanoylcarnitine	C10	ABCC1	WES combined	16:16126475_G/A	rs924136	intron_variant	NA	NA	NA	NA	NA	NA	3.489e-10	0.46993	0.128	1.469e-11
Dodecanoylcarnitine	C12	ABCC1	WES	16:16108282_T/C	rs4148337	intron_variant	7.731e-08	0.35695	0.1413	0.007868	0.33921	0.08588	6.409e-09	0.34845	0.1224	6.473e-09
Dodecanoylcarnitine	C12	ABCC6	WES imputed	16:16256935_G/A	rs72653706	stop_gained	0.9562	0.00182	-0.0164	0.0002617	0.00274	-1.164	0.01018	0.00212	-0.5809	0.0109
Dodecanoylcarnitine	C12	ABCC1	WES combined	16:16126475_G/A	rs924136	intron_variant	NA	NA	NA	NA	NA	NA	3.713e-12	0.46993	0.1402	4.235e-12
Dodecenoylcarnitine	C12:1	ABCC1	WES	16:16138322_T/C	rs246221	synonymous_variant	5.447e-07	0.33122	-0.1413	NA	NA	NA	2.201e-09	0.32989	-0.1276	2.201e-09
Dodecenoylcarnitine	C12:1	ABCC1	WES imputed	16:16139878_A/G	rs35588	splice_region_variant&intron_variant	1.494e-06	0.32165	-0.1371	0.0003499	0.31883	-0.1128	3.229e-09	0.32058	-0.1275	3.229e-09
Dodecenoylcarnitine	C12:1	ABCC1	WES combined	16:16126764_T/C	rs924138	intron_variant	NA	NA	NA	NA	NA	NA	2.257e-12	0.42407	0.1413	2.257e-12
Decenoylcarnitine	C10:1	ABCC1	WES	16:16108282_T/C	rs4148337	intron_variant	3.202e-07	0.35648	0.1371	0.02332	0.33903	0.07263	2.719e-08	0.34807	0.1161	1.07e-08
Decenoylcarnitine	C10:1	ABCC1	WES imputed	16:16139878_A/G	rs35588	splice_region_variant&intron_variant	7.676e-05	0.32165	-0.1113	0.0007054	0.31883	-0.1104	4.213e-07	0.32058	-0.1088	2.459e-07
Decenoylcarnitine	C10:1	ABCC1	WES combined	16:16126764_T/C	rs924138	intron_variant	NA	NA	NA	NA	NA	NA	2.242e-10	0.42407	0.1275	1.037e-10
Decanoylcarnitine	C10	ABCC1	WES	16:16108282_T/C	rs4148337	intron_variant	5.411e-07	0.35695	0.134	0.008875	0.33921	0.08521	2.049e-08	0.34845	0.1195	2.725e-09
Decanoylcarnitine	C10	ABCC1	WES imputed	16:16180896_G/A	rs45573034	intron_variant	0.1804	0.02171	-0.123	0.01456	0.01746	-0.284	0.007794	0.02001	-0.1973	0.001086
Decanoylcarnitine	C10	ABCC1	WES combined	16:16126764_T/C	rs924138	intron_variant	NA	NA	NA	NA	NA	NA	2.533e-11	0.42378	0.1368	1.182e-12
Dodecanoylcarnitine	C12	ABCC1	WES	16:16108282_T/C	rs4148337	intron_variant	7.731e-08	0.35695	0.1413	0.007868	0.33921	0.08588	6.409e-09	0.34845	0.1224	6.473e-09
Dodecanoylcarnitine	C12	ABCC6	WES imputed	16:16256935_G/A	rs72653706	stop_gained	0.9562	0.00182	-0.0164	0.0002617	0.00274	-1.164	0.01018	0.00212	-0.5809	0.0109
Dodecanoylcarnitine	C12	ABCC1	WES combined	16:16126764_T/C	rs924138	intron_variant	NA	NA	NA	NA	NA	NA	2.632e-13	0.42378	0.1482	2.69e-13
Tetradecenoylcarnitine	C14:1	ABCC1	WES	16:16108282_T/C	rs4148337	intron_variant	1.36e-06	0.35648	0.1284	0.1028	0.33903	0.0523	8.76e-07	0.34807	0.1022	1.228e-06
Tetradecenoylcarnitine	C14:1	ABCC6	WES imputed	16:16256935_G/A	rs72653706	stop_gained	0.4158	0.00185	-0.2441	0.0002337	0.00255	-1.217	0.002531	0.00206	-0.6898	0.002607
Tetradecenoylcarnitine	C14:1	ABCC1	WES combined	16:16126764_T/C	rs924138	intron_variant	NA	NA	NA	NA	NA	NA	6.199e-10	0.42407	0.1237	8.276e-10
Octanoylcarnitine	C8	ABCC1	WES	16:16108282_T/C	rs4148337	intron_variant	1.403e-06	0.35695	0.128	0.0456	0.33921	0.06572	2.8e-07	0.34845	0.1081	5.222e-08
Octanoylcarnitine	C8	ABCC6	WES imputed	16:16256935_G/A	rs72653706	stop_gained	0.9702	0.00182	0.01114	0.0008455	0.00274	-1.092	0.01051	0.00212	-0.5761	0.02559
Octanoylcarnitine	C8	ABCC1	WES combined	16:16126764_T/C	rs924138	intron_variant	NA	NA	NA	NA	NA	NA	1.796e-09	0.42378	0.1218	2.168e-10
Dodecenoylcarnitine	C12:1	ABCC1	WES	16:16138322_T/C	rs246221	synonymous_variant	5.447e-07	0.33122	-0.1413	NA	NA	NA	2.201e-09	0.32989	-0.1276	2.201e-09
Dodecenoylcarnitine	C12:1	ABCC1	WES imputed	16:16139878_A/G	rs35588	splice_region_variant&intron_variant	1.494e-06	0.32165	-0.1371	0.0003499	0.31883	-0.1128	3.229e-09	0.32058	-0.1275	3.229e-09
Dodecenoylcarnitine	C12:1	ABCC1	WES combined	16:16139714_T/C	rs35587	synonymous_variant	5.76e-07	0.32798	-0.1416	NA	NA	NA	1.243e-09	0.3263	-0.1301	1.243e-09
Decanoylcarnitine	C10	ABCC1	WES	16:16108282_T/C	rs4148337	intron_variant	5.411e-07	0.35695	0.134	0.008875	0.33921	0.08521	2.049e-08	0.34845	0.1195	2.725e-09
Decanoylcarnitine	C10	ABCC1	WES imputed	16:16180896_G/A	rs45573034	intron_variant	0.1804	0.02171	-0.123	0.01456	0.01746	-0.284	0.007794	0.02001	-0.1973	0.001086
Decanoylcarnitine	C10	ABCC1	WES combined	16:16139714_T/C	rs35587	synonymous_variant	1.157e-05	0.32802	-0.1225	NA	NA	NA	4.459e-08	0.32631	-0.1192	5e-09
Dodecanoylcarnitine	C12	ABCC1	WES	16:16108282_T/C	rs4148337	intron_variant	7.731e-08	0.35695	0.1413	0.007868	0.33921	0.08588	6.409e-09	0.34845	0.1224	6.473e-09
Dodecanoylcarnitine	C12	ABCC6	WES imputed	16:16256935_G/A	rs72653706	stop_gained	0.9562	0.00182	-0.0164	0.0002617	0.00274	-1.164	0.01018	0.00212	-0.5809	0.0109
Dodecanoylcarnitine	C12	ABCC1	WES combined	16:16139714_T/C	rs35587	synonymous_variant	1.334e-07	0.32802	-0.1444	NA	NA	NA	7.2e-10	0.32631	-0.1327	6.536e-10
Tetradecenoylcarnitine	C14:1	NA	WES	17:7210965_A/AGCAGCG	NA	NA	1.699e-05	0.0048	0.8072	NA	NA	NA	NA	NA	NA	NA
Tetradecenoylcarnitine	C14:1	ACADVL	WES imputed	17:7125591_T/C	rs113994167	missense_variant	3.944e-05	0.00124	1.508	2.882e-11	0.00452	1.572	1.136e-14	0.00256	1.568	1.173e-14
Tetradecenoylcarnitine	C14:1	ACADVL	WES combined	17:7125591_T/C	rs113994167	missense_variant	3.944e-05	0.00124	1.508	2.882e-11	0.00452	1.572	1.136e-14	0.00256	1.568	1.173e-14
Tetradecenoylcarnitine	C14:1	NDEL1	WES	17:8363432_G/A	rs751774621	missense_variant	0.0005633	0.00077	1.613	0.05654	0.00095	-1.035	0.1708	0.00084	0.4961	0.1837
Tetradecenoylcarnitine	C14:1	ALOX12B	WES imputed	17:7983134_C/G	rs200167862	missense_variant	NA	0.00046	NA	4.96e-12	0.00385	1.654	2.926e-12	0.00183	1.576	3.27e-12
Tetradecenoylcarnitine	C14:1	ALOX12B	WES combined	17:7983134_C/G	rs200167862	missense_variant	NA	0.00046	NA	4.96e-12	0.00385	1.654	2.926e-12	0.00183	1.576	3.27e-12
lysoPhosphatidylcholine acyl C20:3	lysoPC a C20:3	TM6SF2	WES	19:19379549_C/T	rs58542926	missense_variant	1.667e-05	0.05298	-0.2376	0.0001107	0.05536	-0.2648	1.007e-08	0.05385	-0.2488	5.388e-09
lysoPhosphatidylcholine acyl C20:3	lysoPC a C20:3	SUGP1	WES imputed	19:19388500_A/T	rs8107974	intron_variant	1.667e-05	0.05298	-0.2376	0.0001017	0.0553	-0.2675	9.267e-09	0.05383	-0.25	5.029e-09
lysoPhosphatidylcholine acyl C20:3	lysoPC a C20:3	TM6SF2	WES combined	19:19379549_C/T	rs58542926	missense_variant	1.667e-05	0.05298	-0.2376	0.0001017	0.0553	-0.2675	9.267e-09	0.05383	-0.25	5.029e-09
Phosphatidylcholine diacyl C34:4	PC aa C34:4	TM6SF2	WES	19:19379549_C/T	rs58542926	missense_variant	8.641e-05	0.05298	-0.2258	1.109e-09	0.05536	-0.4008	2.456e-11	0.05385	-0.2927	4.754e-12
Phosphatidylcholine diacyl C34:4	PC aa C34:4	SUGP1	WES imputed	19:19388500_A/T	rs8107974	intron_variant	8.641e-05	0.05298	-0.2258	7.911e-10	0.0553	-0.4063	2.043e-11	0.05383	-0.2945	4.121e-12
Phosphatidylcholine diacyl C34:4	PC aa C34:4	TM6SF2	WES combined	19:19379549_C/T	rs58542926	missense_variant	8.641e-05	0.05298	-0.2258	7.911e-10	0.0553	-0.4063	2.043e-11	0.05383	-0.2945	4.121e-12
Sphingomyeline C16:0	SM C16:0	APOE	WES	19:45412079_C/T	rs7412	missense_variant	2.632e-05	0.07923	-0.2072	3.25e-06	0.08378	-0.254	1.191e-09	0.08119	-0.2268	0.4
Sphingomyeline C16:0	SM C16:0	APOE	WES imputed	19:45412079_C/T	rs7412	missense_variant	2.632e-05	0.07923	-0.2072	3.25e-06	0.08378	-0.254	1.191e-09	0.08119	-0.2268	0.4
Sphingomyeline C16:0	SM C16:0	APOE	WES combined	19:45412079_C/T	rs7412	missense_variant	2.632e-05	0.07923	-0.2072	3.25e-06	0.08378	-0.254	1.191e-09	0.08119	-0.2268	0.4
Sphingomyeline C18:0	SM C18:0	APOE	WES	19:45412079_C/T	rs7412	missense_variant	1.438e-05	0.07923	-0.2137	5.329e-06	0.08378	-0.2512	1.221e-09	0.08119	-0.2278	0.4
Sphingomyeline C18:0	SM C18:0	APOE	WES imputed	19:45412079_C/T	rs7412	missense_variant	1.438e-05	0.07923	-0.2137	5.329e-06	0.08378	-0.2512	1.221e-09	0.08119	-0.2278	0.4
Sphingomyeline C18:0	SM C18:0	APOE	WES combined	19:45412079_C/T	rs7412	missense_variant	1.438e-05	0.07923	-0.2137	5.329e-06	0.08378	-0.2512	1.221e-09	0.08119	-0.2278	0.4
Sphingomyeline C24:0	SM C24:0	APOE	WES	19:45412079_C/T	rs7412	missense_variant	8.891e-07	0.07923	-0.2386	4.979e-08	0.08378	-0.2989	1.993e-12	0.08119	-0.2596	0.3
Sphingomyeline C24:0	SM C24:0	APOE	WES imputed	19:45412079_C/T	rs7412	missense_variant	8.891e-07	0.07923	-0.2386	4.979e-08	0.08378	-0.2989	1.993e-12	0.08119	-0.2596	0.3
Sphingomyeline C24:0	SM C24:0	APOE	WES combined	19:45412079_C/T	rs7412	missense_variant	8.891e-07	0.07923	-0.2386	4.979e-08	0.08378	-0.2989	1.993e-12	0.08119	-0.2596	0.3
Sphingomyeline C24:1	SM C24:1	APOE	WES	19:45412079_C/T	rs7412	missense_variant	1.997e-05	0.07923	-0.2069	1.313e-07	0.08378	-0.2903	4.108e-11	0.08119	-0.2471	0.3
Sphingomyeline C24:1	SM C24:1	APOE	WES imputed	19:45412079_C/T	rs7412	missense_variant	1.997e-05	0.07923	-0.2069	1.313e-07	0.08378	-0.2903	4.108e-11	0.08119	-0.2471	0.2
Sphingomyeline C24:1	SM C24:1	APOE	WES combined	19:45412079_C/T	rs7412	missense_variant	1.997e-05	0.07923	-0.2069	1.313e-07	0.08378	-0.2903	4.108e-11	0.08119	-0.2471	0.2
Proline	Pro	PRODH	WES	22:18910479_C/T	rs13058335	intron_variant	3.685e-32	0.06178	0.6346	8.65e-28	0.06542	0.747	4.803e-55	0.063	0.6789	4.546e-31
Proline	Pro	PRODH	WES imputed	22:18910479_C/T	rs13058335	intron_variant	3.685e-32	0.06178	0.6346	8.65e-28	0.06542	0.747	4.803e-55	0.063	0.6789	4.546e-31
Proline	Pro	PRODH	WES combined	22:18910479_C/T	rs13058335	intron_variant	3.685e-32	0.06178	0.6346	8.65e-28	0.06542	0.747	4.803e-55	0.063	0.6789	4.546e-31

## Sheet: Table S5
Table S5. Gene-trait associations significant (unconditioned) at a 0.05/(15496 * 91) = 3.55e-08 threshold in WES combined, where one variant was sufficient to reach significance.
Trait ID	Trait name	Gene	mask	PVALUE (cond)	Number of variants	Cumulative allele count	Number of variants needed to reach significance
C10:1	Decenoylcarnitine	ACADM	HMI	3.2e-14 (3.1e-12)	10	110	1
C10	Decanoylcarnitine	ETFDH	HMI	1.5e-13 (1.9e-16)	7	19	1
C10	Decanoylcarnitine	ACADM	HMI	2.3e-13 (1.5e-12)	10	111	1
C14:1	Tetradecenoylcarnitine	ACADVL	HMI	7.0e-12 (5.5e-16)	12	151	1
C4	Butyrylcarnitine	ACADS	HMI	1.7e-15 (3.4e-13)	8	63	1
C5	Valerylcarnitine	SLC22A5	HMI	2.2e-10 (2.2e-10)	6	37	1
C6 (C4:1-DC)	Hexanoylcarnitine (Fumarylcarnitine)	ACADM	HMI	8.9e-32 (1.3e-10)	10	110	1
C6 (C4:1-DC)	Hexanoylcarnitine (Fumarylcarnitine)	ETFDH	HMI	2.3e-14 (8.1e-16)	6	18	1
C8	Octanoylcarnitine	ACADM	HMI	4.9e-20 (2.8e-06)	10	111	1
C8	Octanoylcarnitine	ETFDH	HMI	4.9e-15 (4.7e-18)	7	19	1
His	Histidine	HAL	HMI	9.0e-41 (1.4e-37)	19	249	1
His	Histidine	ACTR6	HMI	3.1e-08 (5.6e-07)	4	36	1
Met	Methionine	MAT1A	HMI	2.2e-10 (2.2e-10)	4	30	1
Phe	Phenylalanine	PAH	HMI	1.7e-44 (2.2e-41)	13	163	1
Sarcosine	Sarcosine	SARDH	HMI	2.7e-17 (-)	21	223	1
Sarcosine	Sarcosine	SARDH	LOF	1.1e-18 (-)	3	23	1

## Sheet: Table S6
Table S6. Locus-trait associations with eQTL protein-coding genes colocalized at a PP >= 0.8
				Colocalization Analysis
Trait	Locus	rsid	Mapped Gene	Gene	Tissue	#Variants	Posterior Probability (PP)	Change in gene expression
Ser	1:11856378	rs1801133	MTHFR	MFN2	Whole_Blood	131	0.9999	2.25
Ser	1:11856378	rs1801133	MTHFR	PLOD1	Whole_Blood	131	0.8999	1.05
Asp	4:111398208	rs10004516	ENPEP	ENPEP	Liver	9	0.9933	-1
C10	4:159618737	rs1235904433	ETFDH	ETFDH	Whole_Blood	12	0.9897	0.53
C6..C4.1.DC.	4:159618737	rs1235904433	ETFDH	ETFDH	Whole_Blood	12	0.822	0.9
C8	4:159618737	rs1235904433	ETFDH	ETFDH	Whole_Blood	12	0.9762	0.58
C10.1	4:159631991	rs9410	PPID, ETFDH	ETFDH	Whole_Blood	12	0.9387	1.04
C12	4:159631991	rs9410	PPID, ETFDH	ETFDH	Liver	12	0.8236	1.12
C12	4:159631991	rs9410	PPID, ETFDH	ETFDH	Whole_Blood	12	0.9945	0.88
C16.1	5:131607402	rs10479000	P4HA2, PDLIM4, SLC22A5	SLC22A5	Whole_Blood	34	0.9965	-3.69
C16.1	5:131607402	rs10479000	P4HA2, PDLIM4, SLC22A5	SLC22A4	Whole_Blood	34	0.9619	-0.61
C0	5:131714129	rs386134194	SLC22A5	SLC22A4	Whole_Blood	35	0.8045	-0.53
Taurine	5:176836532	rs1801020	F12;GRK6	F12	Liver	57	1	-4.86
Asp	5:176836532	rs1801020	F12;GRK6	F12	Liver	57	1	-3.65
Sarcosine	6:42946943	rs9462859	PEX6, GNMT	PEX6	Kidney_Cortex	102	0.8744	3.55
Sarcosine	6:42946943	rs9462859	PEX6, GNMT	GNMT	Liver	110	0.979	-2.29
Sarcosine	6:42946943	rs9462859	PEX6, GNMT	PEX6	Liver	110	0.8624	4.95
C16.OH	10:100148308	rs2147895	PYROXD2	HPS1	Liver	62	0.9576	1.43
lysoPC.a.C26.1	11:61560081	rs174538	TMEM258, MYRF, FADS1, FADS2	FADS1	Liver	58	0.995	-2.44
lysoPC.a.C26.1	11:61560081	rs174538	TMEM258, MYRF, FADS1, FADS2	FADS3	Liver	58	0.9771	-2
lysoPC.a.C26.1	11:61560081	rs174538	TMEM258, MYRF, FADS1, FADS2	FADS1	Whole_Blood	58	0.9971	1.47
Asn	11:62105391	rs2513749	ASRGL1	ASRGL1	Liver	22	0.9864	1.18
Asn	11:62105391	rs2513749	ASRGL1	ASRGL1	Whole_Blood	22	0.999	1.88
Gln	12:56866487	-	GLS2	SPRYD4	Whole_Blood	29	0.999	2.02
Asn	14:104576448	rs34362765	ASPG	KIF26A	Whole_Blood	79	0.8664	-0.26
lysoPC.a.C20.3	19:19379549	rs58542926	TM6SF2	MAU2	Whole_Blood	68	0.9972	-0.82
PC.aa.C34.4	19:19379549	rs58542926	TM6SF2, SUGP1	MAU2	Whole_Blood	68	0.9975	-0.7

## Sheet: Table S7
Table S7. Outcomes tested in the MR analysis, selected from https://docs.google.com/spreadsheets/d/1AeeADtT0U1AukliiNyiVzVRdLYPkTbruQSk38DeutU8/edit#gid=511623409
Trait Type	Phenocode	Sex	Description	Category
categorical	20417	both_sexes	Tense, sore, or aching muscles during worst period of anxiety	Online follow-up > Mental health > Anxiety
categorical	20419	both_sexes	Difficulty concentrating during worst period of anxiety	Online follow-up > Mental health > Anxiety
categorical	20421	both_sexes	Ever felt worried, tense, or anxious for most of a month or longer	Online follow-up > Mental health > Anxiety
categorical	20422	both_sexes	More irritable than usual during worst period of anxiety	Online follow-up > Mental health > Anxiety
categorical	20423	both_sexes	Keyed up or on edge during worst period of anxiety	Online follow-up > Mental health > Anxiety
categorical	20425	both_sexes	Ever worried more than most people would in similar situation	Online follow-up > Mental health > Anxiety
categorical	20426	both_sexes	Restless during period of worst anxiety	Online follow-up > Mental health > Anxiety
categorical	20427	both_sexes	Frequent trouble falling or staying asleep during worst period of anxiety	Online follow-up > Mental health > Anxiety
categorical	20428	both_sexes	Professional informed about anxiety	Online follow-up > Mental health > Anxiety
categorical	20429	both_sexes	Easily tired during worst period of anxiety	Online follow-up > Mental health > Anxiety
categorical	20435	both_sexes	Difficulty concentrating during worst depression	Online follow-up > Mental health > Depression
categorical	20437	both_sexes	Thoughts of death during worst depression	Online follow-up > Mental health > Depression
categorical	20441	both_sexes	Ever had prolonged loss of interest in normal activities	Online follow-up > Mental health > Depression
categorical	20446	both_sexes	Ever had prolonged feelings of sadness or depression	Online follow-up > Mental health > Depression
categorical	20447	both_sexes	Depression possibly related to stressful or traumatic event	Online follow-up > Mental health > Depression
categorical	20448	both_sexes	Professional informed about depression	Online follow-up > Mental health > Depression
categorical	20449	both_sexes	Feelings of tiredness during worst episode of depression	Online follow-up > Mental health > Depression
categorical	20450	both_sexes	Feelings of worthlessness during worst period of depression	Online follow-up > Mental health > Depression
categorical	20499	both_sexes	Ever sought or received professional help for mental distress	Online follow-up > Mental health > Mental distress
categorical	20500	both_sexes	Ever suffered mental distress preventing usual activities	Online follow-up > Mental health > Mental distress
categorical	20502	both_sexes	Ever had period extreme irritability	Online follow-up > Mental health > Mania
categorical	20526	both_sexes	Been in serious accident believed to be life-threatening	Online follow-up > Mental health > Traumatic events
categorical	20528	both_sexes	Diagnosed with life-threatening illness	Online follow-up > Mental health > Traumatic events
categorical	20529	both_sexes	Victim of physically violent crime	Online follow-up > Mental health > Traumatic events
categorical	20530	both_sexes	Witnessed sudden violent death	Online follow-up > Mental health > Traumatic events
categorical	20531	both_sexes	Victim of sexual assault	Online follow-up > Mental health > Traumatic events
categorical	20532	both_sexes	Did your sleep change?	Online follow-up > Mental health > Depression
categorical	20533	both_sexes	Trouble falling asleep	Online follow-up > Mental health > Depression
categorical	20534	both_sexes	Sleeping too much	Online follow-up > Mental health > Depression
categorical	20535	both_sexes	Waking too early	Online follow-up > Mental health > Depression
categorical	20536	both_sexes	Weight change during worst episode of depression	Online follow-up > Mental health > Depression
categorical	20536	both_sexes	Weight change during worst episode of depression	Online follow-up > Mental health > Depression
categorical	20536	both_sexes	Weight change during worst episode of depression	Online follow-up > Mental health > Depression
categorical	20538	both_sexes	Worried most days during period of worst anxiety	Online follow-up > Mental health > Anxiety
categorical	20540	both_sexes	Multiple worries during worst period of anxiety	Online follow-up > Mental health > Anxiety
categorical	20541	both_sexes	Difficulty stopping worrying during worst period of anxiety	Online follow-up > Mental health > Anxiety
categorical	20542	both_sexes	Stronger worrying (than other people) during period of worst anxiety	Online follow-up > Mental health > Anxiety
categorical	20543	both_sexes	Number of things worried about during worst period of anxiety	Online follow-up > Mental health > Anxiety
categorical	20544	both_sexes	Mental health problems ever diagnosed by a professional	Online follow-up > Mental health > Mental distress
categorical	20544	both_sexes	Mental health problems ever diagnosed by a professional	Online follow-up > Mental health > Mental distress
categorical	20546	both_sexes	Substances taken for depression	Online follow-up > Mental health > Depression
categorical	20547	both_sexes	Activities undertaken to treat depression	Online follow-up > Mental health > Depression
categorical	20547	both_sexes	Activities undertaken to treat depression	Online follow-up > Mental health > Depression
categorical	20548	both_sexes	Manifestations of mania or irritability	Online follow-up > Mental health > Mania
categorical	20548	both_sexes	Manifestations of mania or irritability	Online follow-up > Mental health > Mania
categorical	20548	both_sexes	Manifestations of mania or irritability	Online follow-up > Mental health > Mania
categorical	20549	both_sexes	Substances taken for anxiety	Online follow-up > Mental health > Anxiety
categorical	20550	both_sexes	Activities undertaken to treat anxiety	Online follow-up > Mental health > Anxiety
continuous	23099	both_sexes	Body fat percentage	UK Biobank Assessment Centre > Physical measures > Anthropometry > Impedance measures
continuous	23104	both_sexes	Body mass index (BMI)	UK Biobank Assessment Centre > Physical measures > Anthropometry > Impedance measures
continuous	23105	both_sexes	Basal metabolic rate	UK Biobank Assessment Centre > Physical measures > Anthropometry > Impedance measures
continuous	48	both_sexes	Waist circumference	UK Biobank Assessment Centre > Physical measures > Anthropometry > Body size measures
icd10	D50	both_sexes	D50 Iron deficiency anaemia	Chapter III Diseases of the blood and blood-forming organs and certain disorders involving the immune mechanism | D50-D53 Nutritional anaemias | D50 Iron deficiency anaemia
icd10	D64	both_sexes	D64 Other anaemias	Chapter III Diseases of the blood and blood-forming organs and certain disorders involving the immune mechanism | D60-D64 Aplastic and other anaemias | D64 Other anaemias
icd10	E03	both_sexes	E03 Other hypothyroidism	Chapter IV Endocrine, nutritional and metabolic diseases | E00-E07 Disorders of thyroid gland | E03 Other hypothyroidism
icd10	E11	both_sexes	E11 Non-insulin-dependent diabetes mellitus	Chapter IV Endocrine, nutritional and metabolic diseases | E10-E14 Diabetes mellitus | E11 Non-insulin-dependent diabetes mellitus
icd10	E66	both_sexes	E66 Obesity	Chapter IV Endocrine, nutritional and metabolic diseases | E65-E68 Obesity and other hyperalimentation | E66 Obesity
icd10	E78	both_sexes	E78 Disorders of lipoprotein metabolism and other lipidaemias	Chapter IV Endocrine, nutritional and metabolic diseases | E70-E90 Metabolic disorders | E78 Disorders of lipoprotein metabolism and other lipidaemias
icd10	F17	both_sexes	F17 Mental and behavioural disorders due to use of tobacco	Chapter V Mental and behavioural disorders | F10-F19 Mental and behavioural disorders due to psychoactive substance use | F17 Mental and behavioural disorders due to use of tobacco
icd10	F32	both_sexes	F32 Depressive episode	Chapter V Mental and behavioural disorders | F30-F39 Mood [affective] disorders | F32 Depressive episode
icd10	G56	both_sexes	G56 Mononeuropathies of upper limb	Chapter VI Diseases of the nervous system | G50-G59 Nerve, nerve root and plexus disorders | G56 Mononeuropathies of upper limb
icd10	I20	both_sexes	I20 Angina pectoris	Chapter IX Diseases of the circulatory system | I20-I25 Ischaemic heart diseases | I20 Angina pectoris
icd10	I21	both_sexes	I21 Acute myocardial infarction	Chapter IX Diseases of the circulatory system | I20-I25 Ischaemic heart diseases | I21 Acute myocardial infarction
icd10	I25	both_sexes	I25 Chronic ischaemic heart disease	Chapter IX Diseases of the circulatory system | I20-I25 Ischaemic heart diseases | I25 Chronic ischaemic heart disease
icd10	I48	both_sexes	I48 Atrial fibrillation and flutter	Chapter IX Diseases of the circulatory system | I30-I52 Other forms of heart disease | I48 Atrial fibrillation and flutter
icd10	I83	both_sexes	I83 Varicose veins of lower extremities	Chapter IX Diseases of the circulatory system | I80-I89 Diseases of veins, lymphatic vessels and lymph nodes, not elsewhere classified | I83 Varicose veins of lower extremities
icd10	I84	both_sexes	I84 Haemorrhoids	Chapter IX Diseases of the circulatory system | I80-I89 Diseases of veins, lymphatic vessels and lymph nodes, not elsewhere classified | I84 Haemorrhoids
icd10	J18	both_sexes	J18 Pneumonia, organism unspecified	Chapter X Diseases of the respiratory system | J09-J18 Influenza and pneumonia | J18 Pneumonia, organism unspecified
icd10	J44	both_sexes	J44 Other chronic obstructive pulmonary disease	Chapter X Diseases of the respiratory system | J40-J47 Chronic lower respiratory diseases | J44 Other chronic obstructive pulmonary disease
icd10	J45	both_sexes	J45 Asthma	Chapter X Diseases of the respiratory system | J40-J47 Chronic lower respiratory diseases | J45 Asthma
icd10	K21	both_sexes	K21 Gastro-oesophageal reflux disease	Chapter XI Diseases of the digestive system | K20-K31 Diseases of oesophagus, stomach and duodenum | K21 Gastro-oesophageal reflux disease
icd10	K22	both_sexes	K22 Other diseases of oesophagus	Chapter XI Diseases of the digestive system | K20-K31 Diseases of oesophagus, stomach and duodenum | K22 Other diseases of oesophagus
icd10	K29	both_sexes	K29 Gastritis and duodenitis	Chapter XI Diseases of the digestive system | K20-K31 Diseases of oesophagus, stomach and duodenum | K29 Gastritis and duodenitis
icd10	K40	both_sexes	K40 Inguinal hernia	Chapter XI Diseases of the digestive system | K40-K46 Hernia | K40 Inguinal hernia
icd10	K44	both_sexes	K44 Diaphragmatic hernia	Chapter XI Diseases of the digestive system | K40-K46 Hernia | K44 Diaphragmatic hernia
icd10	K52	both_sexes	K52 Other non-infective gastro-enteritis and colitis	Chapter XI Diseases of the digestive system | K50-K52 Noninfective enteritis and colitis | K52 Other non-infective gastro-enteritis and colitis
icd10	K57	both_sexes	K57 Diverticular disease of intestine	Chapter XI Diseases of the digestive system | K55-K64 Other diseases of intestines | K57 Diverticular disease of intestine
icd10	K59	both_sexes	K59 Other functional intestinal disorders	Chapter XI Diseases of the digestive system | K55-K64 Other diseases of intestines | K59 Other functional intestinal disorders
icd10	K62	both_sexes	K62 Other diseases of anus and rectum	Chapter XI Diseases of the digestive system | K55-K64 Other diseases of intestines | K62 Other diseases of anus and rectum
icd10	K63	both_sexes	K63 Other diseases of intestine	Chapter XI Diseases of the digestive system | K55-K64 Other diseases of intestines | K63 Other diseases of intestine
icd10	K80	both_sexes	K80 Cholelithiasis	Chapter XI Diseases of the digestive system | K80-K87 Disorders of gallbladder, biliary tract and pancreas | K80 Cholelithiasis
icd10	K92	both_sexes	K92 Other diseases of digestive system	Chapter XI Diseases of the digestive system | K90-K93 Other diseases of the digestive system | K92 Other diseases of digestive system
icd10	N32	both_sexes	N32 Other disorders of bladder	Chapter XIV Diseases of the genitourinary system | N30-N39 Other diseases of urinary system | N32 Other disorders of bladder
icd10	N39	both_sexes	N39 Other disorders of urinary system	Chapter XIV Diseases of the genitourinary system | N30-N39 Other diseases of urinary system | N39 Other disorders of urinary system
icd10	N81	both_sexes	N81 Female genital prolapse	Chapter XIV Diseases of the genitourinary system | N80-N98 Noninflammatory disorders of female genital tract | N81 Female genital prolapse
icd10	N84	both_sexes	N84 Polyp of female genital tract	Chapter XIV Diseases of the genitourinary system | N80-N98 Noninflammatory disorders of female genital tract | N84 Polyp of female genital tract
icd10	N92	both_sexes	N92 Excessive, frequent and irregular menstruation	Chapter XIV Diseases of the genitourinary system | N80-N98 Noninflammatory disorders of female genital tract | N92 Excessive, frequent and irregular menstruation
icd10	N95	both_sexes	N95 Menopausal and other perimenopausal disorders	Chapter XIV Diseases of the genitourinary system | N80-N98 Noninflammatory disorders of female genital tract | N95 Menopausal and other perimenopausal disorders
icd10	R00	both_sexes	R00 Abnormalities of heart beat	Chapter XVIII Symptoms, signs and abnormal clinical and laboratory findings, not elsewhere classified | R00-R09 Symptoms and signs involving the circulatory and respiratory systems | R00 Abnormalities of heart beat
icd10	R06	both_sexes	R06 Abnormalities of breathing	Chapter XVIII Symptoms, signs and abnormal clinical and laboratory findings, not elsewhere classified | R00-R09 Symptoms and signs involving the circulatory and respiratory systems | R06 Abnormalities of breathing
icd10	R07	both_sexes	R07 Pain in throat and chest	Chapter XVIII Symptoms, signs and abnormal clinical and laboratory findings, not elsewhere classified | R00-R09 Symptoms and signs involving the circulatory and respiratory systems | R07 Pain in throat and chest
icd10	R10	both_sexes	R10 Abdominal and pelvic pain	Chapter XVIII Symptoms, signs and abnormal clinical and laboratory findings, not elsewhere classified | R10-R19 Symptoms and signs involving the digestive system and abdomen | R10 Abdominal and pelvic pain
icd10	R19	both_sexes	R19 Other symptoms and signs involving the digestive system and abdomen	Chapter XVIII Symptoms, signs and abnormal clinical and laboratory findings, not elsewhere classified | R10-R19 Symptoms and signs involving the digestive system and abdomen | R19 Other symptoms and signs involving the digestive system and abdomen
phecode	244.4	both_sexes	Hypothyroidism NOS	endocrine/metabolic
phecode	244	both_sexes	Hypothyroidism	endocrine/metabolic
phecode	250.2	both_sexes	Type 2 diabetes	endocrine/metabolic
phecode	250	both_sexes	Diabetes mellitus	endocrine/metabolic
phecode	272.11	both_sexes	Hypercholesterolemia	endocrine/metabolic
phecode	272.1	both_sexes	Hyperlipidemia	endocrine/metabolic
phecode	272	both_sexes	Disorders of lipoid metabolism	endocrine/metabolic
phecode	276	both_sexes	Disorders of fluid, electrolyte, and acid-base balance	endocrine/metabolic
phecode	278.1	both_sexes	Obesity	endocrine/metabolic
phecode	278	both_sexes	Overweight, obesity and other hyperalimentation	endocrine/metabolic
phecode	300	both_sexes	Anxiety disorders	mental disorders
phecode	306	both_sexes	Other mental disorder	mental disorders
phecode	317.1	both_sexes	Alcoholism	mental disorders
phecode	317	both_sexes	Alcohol-related disorders	mental disorders
phecode	318	both_sexes	Tobacco use disorder	mental disorders
phecode	351	both_sexes	Other peripheral nerve disorders	neurological
phecode	396	both_sexes	Abnormal heart sounds	circulatory system
phecode	401.1	both_sexes	Essential hypertension	circulatory system
phecode	401	both_sexes	Hypertension	circulatory system
phecode	411.2	both_sexes	Myocardial infarction	circulatory system
phecode	411.3	both_sexes	Angina pectoris	circulatory system
phecode	411.4	both_sexes	Coronary atherosclerosis	circulatory system
phecode	411.8	both_sexes	Other chronic ischemic heart disease, unspecified	circulatory system
phecode	411	both_sexes	Ischemic Heart Disease	circulatory system
phecode	418	both_sexes	Nonspecific chest pain	circulatory system
phecode	427.2	both_sexes	Atrial fibrillation and flutter	circulatory system
phecode	427	both_sexes	Cardiac dysrhythmias	circulatory system
phecode	433	both_sexes	Cerebrovascular disease	circulatory system
phecode	454.1	both_sexes	Varicose veins of lower extremity	circulatory system
phecode	454	both_sexes	Varicose veins	circulatory system
phecode	455	both_sexes	Hemorrhoids	circulatory system
phecode	459.9	both_sexes	Circulatory disease NEC	circulatory system
phecode	459	both_sexes	Other disorders of circulatory system	circulatory system
phecode	480	both_sexes	Pneumonia	respiratory
phecode	495	both_sexes	Asthma	respiratory
phecode	496.21	both_sexes	Obstructive chronic bronchitis	respiratory
phecode	496.2	both_sexes	Chronic bronchitis	respiratory
phecode	496	both_sexes	Chronic airway obstruction	respiratory
phecode	512	both_sexes	Other symptoms of respiratory system	respiratory
phecode	513	both_sexes	Respiratory abnormalities	respiratory
phecode	519.8	both_sexes	Other diseases of respiratory system, NEC	respiratory
phecode	519	both_sexes	Other diseases of respiratory system, not elsewhere classified	respiratory
phecode	530.11	both_sexes	GERD	digestive
phecode	530.14	both_sexes	Reflux esophagitis	digestive
phecode	530.1	both_sexes	Esophagitis, GERD and related diseases	digestive
phecode	530	both_sexes	Diseases of esophagus	digestive
phecode	535.8	both_sexes	Other specified gastritis	digestive
phecode	535	both_sexes	Gastritis and duodenitis	digestive
phecode	550.1	both_sexes	Inguinal hernia	digestive
phecode	550.2	both_sexes	Diaphragmatic hernia	digestive
phecode	550	both_sexes	Abdominal hernia	digestive
phecode	558	both_sexes	Noninfectious gastroenteritis	digestive
phecode	561	both_sexes	Symptoms involving digestive system	digestive
phecode	562.1	both_sexes	Diverticulosis	digestive
phecode	562	both_sexes	Diverticulosis and diverticulitis	digestive
phecode	563	both_sexes	Constipation	digestive
phecode	564.9	both_sexes	Personal history of diseases of digestive system	digestive
phecode	564	both_sexes	Functional digestive disorders	digestive
phecode	565	both_sexes	Anal and rectal conditions	digestive
phecode	569	both_sexes	Other disorders of intestine	digestive
phecode	574.1	both_sexes	Cholelithiasis	digestive
phecode	574	both_sexes	Cholelithiasis and cholecystitis	digestive
phecode	578.8	both_sexes	Hemorrhage of rectum and anus	digestive
phecode	578	both_sexes	Gastrointestinal hemorrhage	digestive
phecode	585	both_sexes	Renal failure	genitourinary
phecode	591	both_sexes	Urinary tract infection	genitourinary
phecode	593	both_sexes	Hematuria	genitourinary
phecode	596	both_sexes	Other disorders of bladder	genitourinary
phecode	599	both_sexes	Other symptoms/disorders or the urinary system	genitourinary
phecode	600	males	Hyperplasia of prostate	genitourinary
phecode	618.1	females	Prolapse of vaginal walls	genitourinary
phecode	618	females	Genital prolapse	genitourinary
phecode	619	females	Noninflammatory female genital disorders	genitourinary
phecode	622.1	females	Polyp of corpus uteri	genitourinary
phecode	622	females	Polyp of female genital organs	genitourinary
phecode	626.12	females	Excessive or frequent menstruation	genitourinary
phecode	626.1	females	Irregular menstrual cycle/bleeding	genitourinary
phecode	626	females	Disorders of menstruation and other abnormal bleeding from female genital tract	genitourinary
phecode	627	females	Menopausal and postmenopausal disorders	genitourinary

## Sheet: Table S8
Table S8. Results from the Mendelian Randomization analysis
metabolite	outcome	evidence of pleiotropy	pvalue q-statistic	#instruments	R2	IVW-RE estimate	MRE estimate	WME estimate	WMO estimate	IVW-RE pvalue	MRE pvalue	WME pvalue	WMO pvalue
Carnitine	Ever worried more than most people would in similar situation	yes	0	4	0.086	-0.16	-2.41	-0.35	-0.34	7.9e-01	1.8e-05	3.2e-51	8.5e-44
Carnitine	Restless during period of worst anxiety	yes	0	4	0.086	3.91	-2.26	3.77	-0.32	5.2e-04	1.2e-07	NA	3.7e-09
Carnitine	Professional informed about anxiety	yes	0	4	0.086	0.45	-2.61	-0.3	-0.38	6.8e-01	0.0e+00	NA	6.5e-40
Carnitine	Difficulty concentrating during worst depression	yes	0	4	0.086	0.27	-2.68	-0.33	-0.38	7.8e-01	0.0e+00	NA	4.1e-56
Carnitine	Did your sleep change?	yes	0	4	0.086	-0.14	-2.57	-0.36	-0.38	8.2e-01	4.3e-11	3.1e-08	1.3e-30
Carnitine	Number of things worried about during worst period of anxiety	yes	0	4	0.086	-0.39	-2.57	-0.39	-0.38	3.7e-07	2.6e-08	NA	1.3e-61
Carnitine	Substances taken for anxiety	yes	0	4	0.086	-0.2	-2.58	-0.36	-0.38	7.2e-01	2.2e-11	9.3e-29	1.2e-50
Carnitine	Activities undertaken to treat anxiety	yes	0	4	0.086	4.79	-2.68	4.8	-0.38	2.6e-204	0.0e+00	NA	8.2e-57
Carnitine	Obesity	yes	0	4	0.086	2.41	-2.64	0.73	-0.36	1.1e-01	0.0e+00	NA	6.2e-46
Carnitine	Overweight, obesity and other hyperalimentation	yes	0	4	0.086	0.61	-2.67	-0.3	-0.38	6.0e-01	0.0e+00	NA	6.2e-57
Carnitine	Other peripheral nerve disorders	yes	0	4	0.086	0.04	-2.66	-0.35	-0.38	9.6e-01	0.0e+00	NA	6.0e-45
Carnitine	Angina pectoris	yes	0	4	0.086	-0.37	-2.52	-0.39	-0.38	9.6e-03	7.4e-07	1.2e-62	5.5e-60
Carnitine	Other chronic ischemic heart disease, unspecified	yes	0	4	0.086	-0.36	-2.51	-0.38	-0.33	7.6e-02	6.9e-06	NA	5.6e-18
Carnitine	Ischemic Heart Disease	yes	0	4	0.086	0.08	-2.56	-0.33	-0.38	9.2e-01	3.0e-12	NA	2.8e-40
Carnitine	Nonspecific chest pain	yes	0	4	0.086	0.03	-2.55	-0.33	-0.35	9.7e-01	5.2e-13	NA	4.5e-26
Carnitine	Atrial fibrillation and flutter	yes	0	4	0.086	-0.02	-2.59	-0.35	-0.35	9.7e-01	1.1e-13	NA	1.9e-44
Carnitine	Other diseases of respiratory system, not elsewhere classified	yes	0	4	0.086	-0.33	-2.61	-0.38	-0.38	3.0e-01	4.8e-14	NA	3.1e-59
Carnitine	Gastrointestinal hemorrhage	yes	0	4	0.086	-0.38	-2.56	-0.39	-0.38	1.1e-06	3.2e-09	NA	5.2e-62
Carnitine	Noninflammatory female genital disorders	yes	0	4	0.086	4.72	-2.58	4.73	-0.38	9.0e-42	0.0e+00	NA	1.2e-34
Carnitine	Menopausal and postmenopausal disorders	yes	0	4	0.086	0.08	-2.69	-0.35	-0.38	9.3e-01	0.0e+00	NA	5.0e-60
Carnitine	D50 Iron deficiency anaemia	yes	0	4	0.086	-0.16	-2.66	-0.37	-0.38	8.0e-01	0.0e+00	NA	3.0e-59
Carnitine	E66 Obesity	yes	0	4	0.086	2.59	-2.64	1.27	-0.36	8.0e-02	0.0e+00	NA	3.6e-45
Carnitine	G56 Mononeuropathies of upper limb	yes	0	4	0.086	0.64	-2.32	-0.22	-0.37	5.8e-01	1.8e-06	NA	1.3e-13
Carnitine	I20 Angina pectoris	yes	0	4	0.086	-0.33	-2.49	-0.38	-0.38	2.4e-01	2.4e-06	2.1e-57	3.7e-55
Carnitine	I48 Atrial fibrillation and flutter	yes	0	4	0.086	-0.13	-2.59	-0.35	-0.34	8.4e-01	4.1e-14	NA	1.1e-29
Carnitine	J18 Pneumonia, organism unspecified	yes	0	4	0.086	0.15	-2.68	-0.34	-0.38	8.7e-01	0.0e+00	NA	2.2e-57
Carnitine	K80 Cholelithiasis	yes	0	4	0.086	4.55	-2.67	4.56	-0.38	6.8e-13	0.0e+00	NA	8.3e-46
Carnitine	N39 Other disorders of urinary system	yes	0	4	0.086	3.75	-2.67	3.59	-0.35	1.7e-03	0.0e+00	NA	6.9e-49
Carnitine	R07 Pain in throat and chest	yes	0	4	0.086	4.12	-2.5	4.07	-0.36	3.8e-05	2.4e-11	NA	8.7e-37
Carnitine	R10 Abdominal and pelvic pain	yes	0	4	0.086	-0.3	-2.46	-0.37	-0.37	3.9e-01	6.2e-06	NA	3.9e-59
Hexanoylcarnitine (Fumarylcarnitine)	Thoughts of death during worst depression	yes	0	4	0.105	0.18	-3.77	-0.6	-0.58	8.8e-01	0.0e+00	4.0e-68	2.6e-55
lysoPhosphatidylcholine acyl C20:3	Ever sought or received professional help for mental distress	yes	0	4	0.037	2.67	-5.32	1.8	-0.34	9.0e-02	1.4e-13	NA	7.8e-10
lysoPhosphatidylcholine acyl C20:3	Trouble falling asleep	yes	0	4	0.037	-1.56	-12.06	-1.57	-0.59	1.4e-46	4.0e-07	1.9e-17	1.1e-05
lysoPhosphatidylcholine acyl C20:3	Disorders of fluid, electrolyte, and acid-base balance	yes	0	4	0.037	-0.33	-12.32	-1.22	-0.85	8.2e-01	1.8e-12	NA	5.5e-08
lysoPhosphatidylcholine acyl C20:3	Abdominal hernia	yes	0	4	0.037	-0.29	-5.16	-0.29	-0.3	6.4e-02	0.0e+00	NA	7.5e-09
lysoPhosphatidylcholine acyl C20:3	Anal and rectal conditions	yes	0	4	0.037	0.35	-12.3	-1.03	-0.65	8.4e-01	0.0e+00	NA	3.5e-06
lysoPhosphatidylcholine acyl C20:3	F32 Depressive episode	yes	0	4	0.037	4.72	-7.38	4.77	-0.27	1.2e-08	2.1e-05	NA	1.1e-05
Phosphatidylcholine diacyl C34:4	Ever sought or received professional help for mental distress	yes	0	4	0.049	2.25	-3.68	-0.02	-0.18	1.4e-01	2.0e-07	NA	9.0e-08
Phosphatidylcholine diacyl C34:4	Atrial fibrillation and flutter	yes	0	4	0.049	-0.25	-3.77	-0.25	-0.27	1.6e-03	6.4e-06	NA	2.7e-12
Phosphatidylcholine diacyl C34:4	Obstructive chronic bronchitis	yes	0	4	0.049	4.63	-3.98	4.62	-0.28	9.2e-08	8.7e-06	NA	1.7e-05
Phosphatidylcholine diacyl C34:4	Other diseases of respiratory system, NEC	yes	0	4	0.049	-0.09	-3.95	-0.25	-0.25	8.7e-01	0.0e+00	NA	1.4e-10
Phosphatidylcholine diacyl C34:4	Other diseases of respiratory system, not elsewhere classified	yes	0	4	0.049	4.51	-3.98	4.48	-0.27	2.1e-06	0.0e+00	NA	6.8e-11
Phosphatidylcholine diacyl C34:4	Abdominal hernia	yes	0	4	0.049	-0.24	-3.87	-0.25	-0.28	6.1e-02	3.2e-10	NA	1.3e-12
Phosphatidylcholine diacyl C34:4	Diverticulosis	yes	0	4	0.049	-1.31	-6.93	-1.33	-0.35	9.0e-09	5.6e-08	NA	1.2e-05
Phosphatidylcholine diacyl C34:4	Diverticulosis and diverticulitis	yes	0	4	0.049	-1.33	-6.92	-1.33	-0.35	1.7e-26	1.1e-07	NA	1.4e-05
Phosphatidylcholine diacyl C34:4	D50 Iron deficiency anaemia	yes	0	4	0.049	-0.19	-6.66	-1.01	-0.31	8.9e-01	3.5e-08	5.0e-32	1.3e-06
Phosphatidylcholine diacyl C34:4	I48 Atrial fibrillation and flutter	yes	0	4	0.049	-0.22	-3.81	-0.25	-0.27	3.8e-01	9.0e-07	NA	4.4e-12
Phosphatidylcholine diacyl C34:4	J44 Other chronic obstructive pulmonary disease	yes	0	4	0.049	4.16	-3.99	4.05	-0.27	4.0e-04	1.2e-06	NA	2.5e-06
Phosphatidylcholine diacyl C34:4	K57 Diverticular disease of intestine	yes	0	4	0.049	-1.32	-7.15	-1.33	-0.35	1.4e-17	0.0e+00	NA	7.8e-06
Propionylcarnitine	Easily tired during worst period of anxiety	yes	0	5	0.055	-0.35	-3.27	-0.56	-0.56	4.4e-01	0.0e+00	NA	1.2e-23
Propionylcarnitine	Difficulty concentrating during worst depression	yes	0	5	0.055	0.16	-6.57	-0.51	-0.56	8.6e-01	4.2e-06	NA	8.9e-25
Propionylcarnitine	Ever sought or received professional help for mental distress	yes	0	5	0.055	0.96	-7.45	-0.35	-0.28	4.2e-01	0.0e+00	NA	2.0e-11
Propionylcarnitine	Overweight, obesity and other hyperalimentation	yes	0	5	0.055	-0.25	-6.13	-0.57	-0.54	7.0e-01	1.9e-05	NA	1.9e-23
Propionylcarnitine	D50 Iron deficiency anaemia	yes	0	5	0.055	-0.47	-7.07	-0.6	-0.59	2.7e-01	2.3e-11	NA	2.5e-25
Propionylcarnitine	K52 Other non-infective gastro-enteritis and colitis	yes	0	5	0.055	0.76	-3.26	-0.14	-0.54	3.3e-01	0.0e+00	NA	2.3e-23
Propionylcarnitine	K80 Cholelithiasis	yes	0	5	0.055	4.54	-7.18	4.56	-0.52	1.6e-92	1.2e-07	NA	1.4e-20
Propionylcarnitine	N39 Other disorders of urinary system	yes	0	5	0.055	0.03	-7.01	-0.53	-0.52	9.7e-01	1.5e-09	NA	6.7e-23
Propionylcarnitine	R10 Abdominal and pelvic pain	yes	0	5	0.055	0.69	-3.2	-0.18	-0.44	3.8e-01	4.7e-12	NA	1.5e-19
Putrescine	Waist circumference	no	0.25	4	0.059	-0.04	-0.03	-0.05	-0.05	1.8e-12	1.0e-01	2.5e-10	1.2e-06
Putrescine	Asthma	yes	0	4	0.059	-2.75	1.95	-2.75	0.14	1.1e-74	3.1e-06	NA	1.6e-07
Putrescine	Abdominal hernia	yes	0	4	0.059	-0.6	1.92	0.04	0.2	4.4e-01	2.0e-05	NA	1.4e-16
Putrescine	D50 Iron deficiency anaemia	yes	0	4	0.059	-0.05	1.88	0.17	0.16	9.3e-01	1.1e-05	5.9e-14	2.1e-11
Serine	Symptoms involving digestive system	yes	0	4	0.065	1.52	6.84	1.52	1.52	2.0e-39	0.0e+00	NA	2.0e-18
