# Supplementary figures and images for: Whole Exome Sequencing Enhanced Imputation Identifies 85 Metabolite Associations in the Alpine CHRIS Cohort
Source: MDPI journal article supplement (doi:10.3390/metabo12070604), 2022-06-29

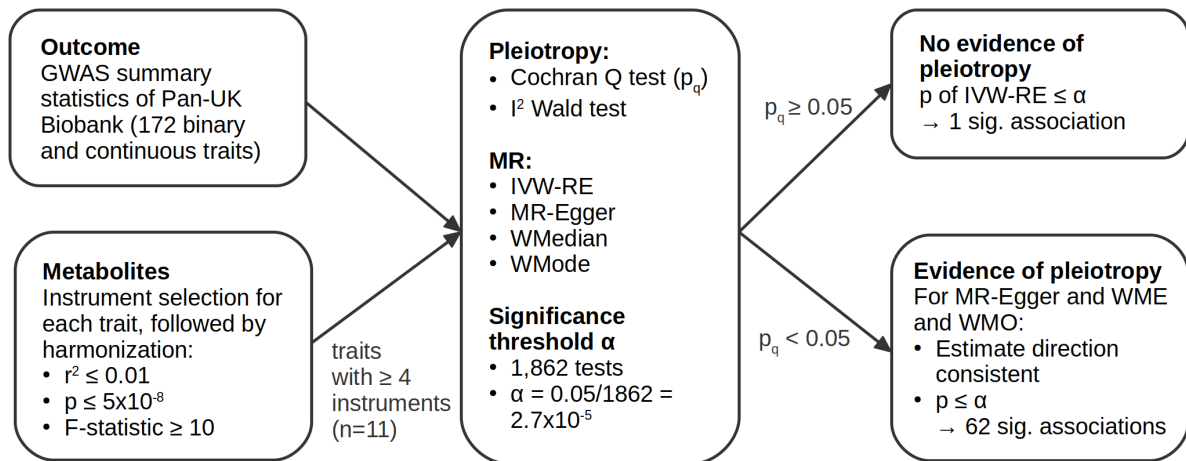

**Figure S3.** Flowchart of the Mendelian randomization analysis.

Supplement: s1 [file s1]
